# Supplementary material for: Structural Annotation of Mycobacterium tuberculosis Proteome
Source: PubMed Central journal article supplement (PMC3205055; doi:10.1371/journal.pone.0027044), 2011-10-31
Supplement: pone.0027044.s012.pdf [file pone.0027044.s012.pdf]

| Sl. No | Gene Name | Superpose                                                                           | Z-score | RMSD(Å) | % Seq ID | % Covrg | Fold                                                                                                                     |
|--------|-----------|-------------------------------------------------------------------------------------|---------|---------|----------|---------|--------------------------------------------------------------------------------------------------------------------------|
| 1      | Rv0006    | 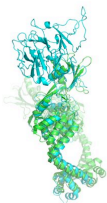   | 38.7    | 3.6     | 34       | 86.4    | <br>fold:e.11.1.1;<br>e-value:e-106   |
| 2      | Rv0016c   |    | 36      | 2.6     | 19       | 93.89   | <br>fold:e.3.1.1;<br>e-value:e-124    |
| 3      | Rv0033    |   | 8.6     | 2.1     | 30       | 95.4    | <br>fold:a.28.1.1;<br>e-value:1e-33  |
| 4      | Rv0054    |  | 18      | 1.4     | 97       | 71.34   | <br>fold:b.40.4.3;<br>e-value:3e-40 |
| 5      | Rv0098    |  | 15.5    | 0.2     | 84.47    | 67%     |                                                                                                                          |
| 6      | Rv0130    |  | 14.7    | 2.2     | 30       | 89.4    | <br>fold:d.38.1.4;<br>e-value:7e-51 |

|    |         |                                                                                     |      |     |    |       |                                                                                                                          |
|----|---------|-------------------------------------------------------------------------------------|------|-----|----|-------|--------------------------------------------------------------------------------------------------------------------------|
| 7  | Rv0223c | 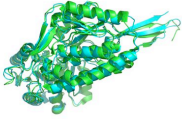   | 54   | 1.8 | 38 | 98.36 | <br>fold:c.82.1.1;<br>e-value:0.0     |
| 8  | Rv0233  |    | 27.1 | 2.1 | 22 | 89.17 | <br>fold:a.25.1.2;<br>e-value:e-103   |
| 9  | Rv0287  |    | 2.7  | 4.6 | 35 | 87.63 |                                                                                                                          |
| 10 | Rv0288  |  | 3.4  | 5.6 | 21 | 97.92 |                                                                                                                          |
| 11 | Rv0321  |  | 20.6 | 3.3 | 44 | 96.84 | <br>fold:b.85.4.1;<br>e-value:4e-86 |
| 12 | Rv0363c |  | 40.1 | 1.9 | 41 | 97.09 | <br>fold:c.1.10.2;<br>e-value:e-155 |

|    |         |                                                                                     |      |     |    |       |                                                                                                                           |
|----|---------|-------------------------------------------------------------------------------------|------|-----|----|-------|---------------------------------------------------------------------------------------------------------------------------|
| 13 | Rv0371c | 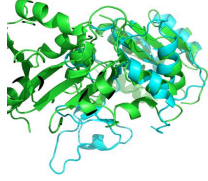   | 13.9 | 2.5 | 19 | 97.46 | <br>fold:c.68.1.5;<br>e-value:1e-18    |
| 14 | Rv0391  |    | 50   | 1.6 | 40 | 94.58 | <br>fold:c.67.1.3;<br>e-value:0.0      |
| 15 | Rv0407  |    | 45.3 | 1.7 | 34 | 98.21 | <br>fold:c.1.16.3;<br>e-value:e-177    |
| 16 | Rv0410c |  | 16.6 | 3.5 | 23 | 45.33 | <br>fold:d.144.1.7;<br>e-value:4e-66 |
| 17 | Rv0429c |  | 20.7 | 1.8 | 41 | 89.34 | <br>fold:d.167.1.1;<br>e-value:2e-69 |
| 18 | Rv0554  |  | 28.4 | 2.2 | 28 | 98.09 | <br>fold:c.69.1.10;<br>e-value:5e-59 |

|    |         |                                                                                     |      |     |    |       |                                                                                                                            |
|----|---------|-------------------------------------------------------------------------------------|------|-----|----|-------|----------------------------------------------------------------------------------------------------------------------------|
| 19 | Rv0627  | 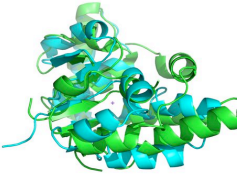   | 12.4 | 3.1 | 20 | 97.78 |                                                                                                                            |
| 20 | Rv0735  |    | 9.1  | 2   | 19 | 96.05 |                                                                                                                            |
| 21 | Rv0802c |    | 17.4 | 2.5 | 25 | 81.65 | <br>fold:d.108.1.1;<br>e-value:3e-62    |
| 22 | Rv0805  |  | 18.8 | 3   | 18 | 93.08 | <br>fold:d.159.1.11;<br>e-value:7e-12 |
| 23 | Rv0813c |  | 16.8 | 2.3 | 33 | 72.12 | <br>fold:b.60.1.8;<br>e-value:3e-45   |
| 24 | Rv0815c |  | 38.6 | 1.3 | 51 |       | <br>fold:c.46.1.2;<br>e-value:4e-79   |

|    |         |                                                                                     |      |     |    |       |                                                                                                                          |
|----|---------|-------------------------------------------------------------------------------------|------|-----|----|-------|--------------------------------------------------------------------------------------------------------------------------|
| 25 | Rv0844c | 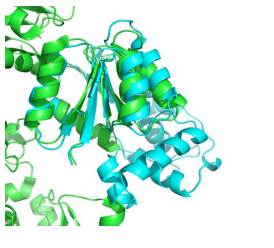   | 16.9 | 1.8 | 31 | 96.3  | <br>fold:c.23.1.1;<br>e-value:7e-56   |
| 26 | Rv0855  |    | 39.9 | 1.4 | 59 | 95.82 | <br>fold:c.123.1.1;<br>e-value:0.0    |
| 27 | Rv0858c |   | 49.3 | 1.8 | 45 | 96.47 | <br>fold:c.67.1.1;<br>e-value:e-162   |
| 28 | Rv0865  |  | 24.5 | 1.5 | 36 | 95.63 | <br>fold:c.57.1.1;<br>e-value:4e-69 |
| 29 | Rv0884c |  | 39   | 2.3 | 20 | 99.2  | <br>fold:c.67.1.4;<br>e-value:1e-46 |
| 30 | Rv0899  |  | 1.1  | 3   | 36 | 34.05 |                                                                                                                          |

|    |         |                                                                                     |      |     |    |       |                                                                                                                          |
|----|---------|-------------------------------------------------------------------------------------|------|-----|----|-------|--------------------------------------------------------------------------------------------------------------------------|
| 31 | Rv0905  | 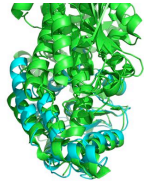   | 25.6 | 2.1 | 33 | 98.35 | <br>fold:c.14.1.3;<br>e-value:3e-91   |
| 32 | Rv0946c |    | 57.6 | 1.5 | 50 | 96.56 | <br>fold:c.80.1.2;<br>e-value:0.0     |
| 33 | Rv0948c |    | 8.2  | 2.2 | 29 | 71.43 | <br>fold:a.130.1.1;<br>e-value:1e-16  |
| 34 | Rv0956  |  | 26.8 | 1.9 | 35 | 89.77 | <br>fold:c.65.1.1;<br>e-value:e-100 |
| 35 | Rv1014c |  | 19.4 | 2.9 | 43 | 92.67 | <br>fold:c.56.3.1;<br>e-value:4e-96 |
| 36 | Rv1018c |  | 43.9 | 1.3 | 43 | 91.52 | <br>fold:c.68.1.5;<br>e-value:e-134 |
| 37 | Rv1070c |  | 38.3 | 0.9 | 50 | 98.83 | <br>fold:c.14.1.3;<br>e-value:e-134 |

|    |         |                                                                                     |      |     |    |       |                                                                                                                          |
|----|---------|-------------------------------------------------------------------------------------|------|-----|----|-------|--------------------------------------------------------------------------------------------------------------------------|
| 38 | Rv1086  | 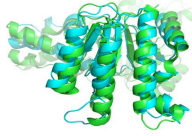   | 25.5 | 2.3 | 34 | 85.11 | <br>fold:c.101.1.1;<br>e-value:1e-90  |
| 39 | Rv1093  |    | 54   | 1.3 | 58 | 95.07 | <br>fold:c.67.1.4;<br>e-value:0.0     |
| 40 | Rv1098c |    | 51.7 | 1.9 | 50 | 95.99 | <br>fold:a.127.1.1;<br>e-value:0.0    |
| 41 | Rv1131  |   | 56.4 | 1.4 | 60 | 92.62 | <br>fold:a.103.1.1;<br>e-value:0.0  |
| 42 | Rv1201c |  | 8.3  | 3.2 | 22 | 43.22 | <br>fold:b.81.1.2;<br>e-value:2e-28 |
| 43 | Rv1207  |  | 25.5 | 1.9 | 34 | 86.48 | <br>fold:c.1.21.1;<br>e-value:e-139 |
| 44 | Rv1208  |  | 13   | 3.4 | 15 | 59.88 |                                                                                                                          |

|    |         |                                                                                     |      |     |    |       |                                                                                                                          |
|----|---------|-------------------------------------------------------------------------------------|------|-----|----|-------|--------------------------------------------------------------------------------------------------------------------------|
| 45 | Rv1256c | 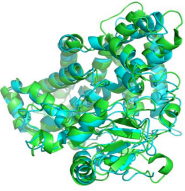   | 42   | 2.5 | 31 | 98.52 | <br>fold:a.104.1.1;<br>e-value:e-104  |
| 46 | Rv1295  |    | 49.6 | 1.9 | 59 | 96.11 | <br>fold:c.79.1.1;<br>e-value:0.0     |
| 47 | Rv1326c |    | 43.8 | 1.3 | 52 | 83.17 | <br>fold:c.1.8.1;<br>e-value:0.0      |
| 48 | Rv1335  |   | 14.1 | 2   | 30 | 95.7  |                                                                                                                          |
| 49 | Rv1336  |  | 41   | 1.8 | 42 | 92.88 |                                                                                                                          |
| 50 | Rv1340  |  | 36.9 | 1.2 | 57 | 91.89 | <br>fold:d.14.1.4;<br>e-value:2e-77 |
| 51 | Rv1404  |  | 14.5 | 2.9 | 23 | 89.38 | <br>fold:a.4.5.28;<br>e-value:7e-60 |



|    |         |                                                                                     |      |     |    |       |                                                                                                                           |
|----|---------|-------------------------------------------------------------------------------------|------|-----|----|-------|---------------------------------------------------------------------------------------------------------------------------|
| 52 | Rv1411c | 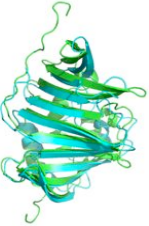   | 17.6 | 2.8 | 32 | 81.36 | <br>fold:b.125.1.3;<br>e-value:6e-66   |
| 53 | Rv1438  |    | 38.4 | 1.4 | 50 | 96.55 | <br>fold:c.1.1.1;<br>e-value:e-101     |
| 54 | Rv1445c |    | 29.3 | 2.1 | 32 | 96.76 | <br>fold:c.124.1.1;<br>e-value:4e-49   |
| 55 | Rv1496  |  | 7.8  | 3.5 | 21 | 95.81 | <br>fold:c.37.1.10;<br>e-value:3e-10 |
| 56 | Rv1568  |  | 60.2 | 1.2 | 50 | 96.8  | <br>fold:c.67.1.4;<br>e-value:0.0    |
| 57 | Rv1570  |  | 24.6 | 2.4 | 26 | 96.9  | <br>fold:c.37.1.10;<br>e-value:4e-76 |
| 58 | Rv1612  |  | 21.8 | 5   | 58 | 90.76 | <br>fold:c.79.1.1;<br>e-value:0.0    |

|    |        |                                                                                     |      |     |    |       |                                                                                                                          |
|----|--------|-------------------------------------------------------------------------------------|------|-----|----|-------|--------------------------------------------------------------------------------------------------------------------------|
| 59 | Rv1652 | 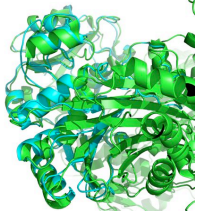   | 46.1 | 1.6 | 39 | 97.16 | <br>fold:d.81.1.1;<br>e-value:1e-85   |
| 60 | Rv1653 |    | 21.1 | 1.7 | 34 | 94.31 | <br>fold:d.154.1.2;<br>e-value:e-173  |
| 61 | Rv1656 |    | 44.5 | 1.4 | 50 | 98.05 | <br>fold:c.78.1.1;<br>e-value:3e-87   |
| 62 | Rv1657 |   | 12.9 | 1.7 | 33 | 88.82 | <br>fold:d.74.2.1;<br>e-value:5e-28 |
| 63 | Rv1689 |  | 37.4 | 1.7 | 55 | 74.53 | <br>fold:c.26.1.1;<br>e-value:e-161 |
| 64 | Rv1826 |  | 23.4 | 1.1 | 53 | 97.01 | <br>fold:b.84.1.1;<br>e-value:8e-67 |
| 65 | Rv1827 |  | 8.6  | 2.6 | 26 | 91.36 |                                                                                                                          |

|    |         |                                                                                     |      |     |    |       |                                                                                                                           |
|----|---------|-------------------------------------------------------------------------------------|------|-----|----|-------|---------------------------------------------------------------------------------------------------------------------------|
| 66 | Rv1846c | 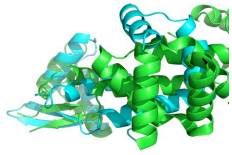   | 11.7 | 6.3 | 21 | 85.51 | <br>fold:a.4.5.39;<br>e-value:2e-45    |
| 67 | Rv1876  |    | 25.5 | 0.7 | 48 | 96.86 |                                                                                                                           |
| 68 | Rv1938  |    | 39.2 | 2   | 35 | 97.75 |                                                                                                                           |
| 69 | Rv1941  |   | 35.4 | 1.5 | 37 | 97.27 | <br>fold:c.2.1.2;<br>e-value:e-140   |
| 70 | Rv1985c |  | 13.2 | 4.8 | 21 | 93.73 | <br>fold:c.94.1.1;<br>e-value:3e-94  |
| 71 | Rv1994c |  | 10.9 | 2   | 31 | 77.97 |                                                                                                                           |
| 72 | Rv2027c |  | 17   | 2.2 | 19 | 32.46 | <br>fold:d.110.2.1;<br>e-value:2e-65 |

|    |         |                                                                                     |      |     |    |       |                                                                                                                           |
|----|---------|-------------------------------------------------------------------------------------|------|-----|----|-------|---------------------------------------------------------------------------------------------------------------------------|
| 73 | Rv2043c | 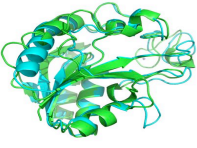   | 24.4 | 2   | 39 | 96.77 | <br>fold:c.33.1.3;<br>e-value:7e-77    |
| 74 | Rv2069  |    | 13.7 | 1.4 | 30 | 95.68 | <br>fold:a.177.1.1;<br>e-value:4e-45   |
| 75 | Rv2158c |    | 41   | 2.5 | 38 | 86.36 |                                                                                                                           |
| 76 | Rv2202c |   | 29   | 2.7 | 23 | 94.75 | <br>fold:c.72.1.1;<br>e-value:e-103  |
| 77 | Rv2210c |  | 40.5 | 1.8 | 39 | 95.38 | <br>fold:e.17.1.1;<br>e-value:e-167  |
| 78 | Rv2243  |  | 45.6 | 1.3 | 54 | 99.67 | <br>fold:c.19.1.1;<br>e-value:3e-62  |
| 79 | Rv2266  |  | 44.8 | 2.1 | 32 | 94.63 | <br>fold:a.104.1.1;<br>e-value:e-110 |

|    |         |                                                                                     |      |     |    |       |                                                                                                                          |
|----|---------|-------------------------------------------------------------------------------------|------|-----|----|-------|--------------------------------------------------------------------------------------------------------------------------|
| 80 | Rv2334  | 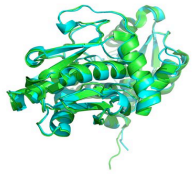   | 48.5 | 0.8 | 58 | 97.42 | <br>fold:c.79.1.1;<br>e-value:e-166   |
| 81 | Rv2359  |    | 11.8 | 4.7 | 34 | 90.77 | <br>fold:a.4.5.42;<br>e-value:3e-53   |
| 82 | Rv2361c |    | 26.4 | 1.9 | 38 | 76.69 | <br>fold:c.101.1.1;<br>e-value:e-108  |
| 83 | Rv2386c |  | 47.3 | 2.3 | 38 | 92    | <br>fold:d.161.1.1;<br>e-value:0.0  |
| 84 | Rv2436  |  | 37.8 | 1.7 | 38 | 94.41 | <br>fold:c.72.1.1;<br>e-value:e-117 |
| 85 | Rv2447c |  | 44.2 | 2.8 | 34 | 93.84 | <br>fold:c.72.2.2;<br>e-value:e-132 |

|    |         |                                                                                     |      |     |    |       |                                                                                                                          |
|----|---------|-------------------------------------------------------------------------------------|------|-----|----|-------|--------------------------------------------------------------------------------------------------------------------------|
| 86 | Rv2495c | 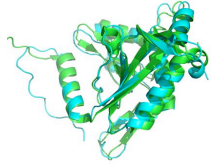   | 29.6 | 2   | 36 | 60.05 | <br>fold:c.43.1.1;<br>e-value:e-114   |
| 87 | Rv2523c |    | 10.4 | 3.1 | 31 | 96.92 | <br>fold:d.150.1.2;<br>e-value:4e-44  |
| 88 | Rv2579  |    | 52.6 | 0.5 | 69 | 98.67 | <br>fold:c.69.1.8;<br>e-value:0.0     |
| 89 | Rv2593c |  | 23.1 | 2.7 | 81 | 99.49 | <br>fold:b.40.4.2;<br>e-value:1e-29 |
| 90 | Rv2623  |  | 11.6 | 2.1 | 30 | 48.82 | <br>fold:c.26.2.4;<br>e-value:1e-34 |
| 91 | Rv2701c |  | 29.8 | 2   | 32 | 93.45 | <br>fold:e.7.1.1;<br>e-value:e-112  |
| 92 | Rv2704  |  | 18.4 | 1.8 | 29 | 85.21 | <br>fold:d.79.1.1;<br>e-value:1e-54 |

|    |         |                                                                                     |      |     |    |       |                                                                                                                           |
|----|---------|-------------------------------------------------------------------------------------|------|-----|----|-------|---------------------------------------------------------------------------------------------------------------------------|
| 93 | Rv2726c | 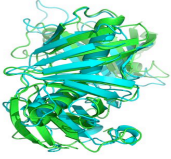   | 25.7 | 3.4 | 26 | 97.23 | <br>fold:d.21.1.1;<br>e-value:6e-58    |
| 94 | Rv2737c |    | 42.3 | 0.8 | 81 | 42.53 | <br>fold:c.37.1.11;<br>e-value:e-126   |
| 95 | Rv2780  |    | 46.2 | 3   | 49 | 96.77 | <br>fold:c.23.12.2;<br>e-value:9e-78   |
| 96 | Rv2844  |   | 15.8 | 2.3 | 21 | 79.63 | <br>fold:a.25.1.9;<br>e-value:7e-23   |
| 97 | Rv2865  |  | 8    | 2.2 | 26 | 84.95 | <br>fold:d.306.1.1;<br>e-value:9e-30 |
| 98 | Rv2866  |  | 10.8 | 2.2 | 26 | 95.4  |                                                                                                                           |
| 99 | Rv2874  |  | 17.5 | 2.1 | 24 | 20.86 | <br>fold:c.47.1.10;<br>e-value:1e-59 |

|     |         |                                                                                     |      |     |       |       |                                                                                                                           |
|-----|---------|-------------------------------------------------------------------------------------|------|-----|-------|-------|---------------------------------------------------------------------------------------------------------------------------|
| 100 | Rv2883c |    | 35.6 | 1.4 | 89.27 | 55    | <br>fold:c.73.1.3;<br>e-value:e-123    |
| 101 | Rv2919c |    | 14.8 | 1.5 | 62    | 99.11 | <br>fold:d.58.5.1; e<br>value:3e-58    |
| 102 | Rv2933  |    | 1.4  | 4.3 | 43    | 41.41 |                                                                                                                           |
| 103 | Rv2941  |   | 32.9 | 2.8 | 19    | 98.45 | <br>fold:e.23.1.1; e<br>value:e-180  |
| 104 | Rv2976c |  | 32.4 | 1.4 | 49    | 93.83 | <br>fold:c.18.1.1;<br>e-value:4e-77  |
| 105 | Rv2981c |  | 32.1 | 3.3 | 36    | 95.71 | <br>fold:d.142.1.1;<br>e-value:e-100 |
| 106 | Rv2986c |  | 10.1 | 2.5 | 44    | 41.59 | <br>fold:a.55.1.1;<br>e-value:8e-38  |



|     |         |                                                                                     |      |     |    |       |                                                                                                                           |
|-----|---------|-------------------------------------------------------------------------------------|------|-----|----|-------|---------------------------------------------------------------------------------------------------------------------------|
| 107 | Rv2987c | 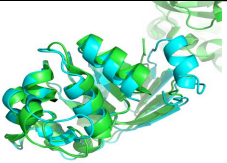   | 24   | 1.7 | 41 | 84.34 | <br>fold:c.8.2.1;<br>e-value:2e-26     |
| 108 | Rv2992c |    | 38.7 | 3.5 | 37 | 97.55 | <br>fold:c.26.1.1;<br>e-value:e-155    |
| 109 | Rv3019c |    | 1.8  | 3.4 | 24 | 97.92 |                                                                                                                           |
| 110 | Rv3020c |   | 2.2  | 4   | 31 | 97.94 |                                                                                                                           |
| 111 | Rv3132c |  | 16.3 | 2.4 | 24 | 28.89 | <br>fold:d.110.2.1;<br>e-value:4e-68 |
| 112 | Rv3248c |  | 49.7 | 1.8 | 60 | 96.57 | <br>fold:c.23.12.3;<br>e-value:5e-62 |
| 113 | Rv3250c |  | 8.8  | 1   | 51 | 86.67 |                                                                                                                           |

|     |         |                                                                                     |      |     |    |       |                                                                                                                           |
|-----|---------|-------------------------------------------------------------------------------------|------|-----|----|-------|---------------------------------------------------------------------------------------------------------------------------|
| 114 | Rv3279c | 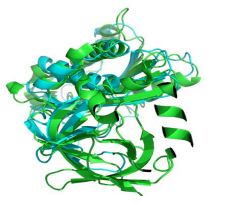   | 26.3 | 2.2 | 32 | 96.24 |                                                                                                                           |
| 115 | Rv3283  |    | 39.6 | 1.3 | 52 | 93.27 | <br>fold:c.46.1.2;<br>e-value:1e-80    |
| 116 | Rv3290c |    | 43.8 | 2.2 | 29 | 95.55 | <br>fold:c.67.1.4;<br>e-value:e-176    |
| 117 | Rv3291c |   | 16.3 | 2.6 | 27 | 96.67 | <br>fold:a.4.5.32;<br>e-value:6e-24   |
| 118 | Rv3315c |  | 19.3 | 1.4 | 40 | 92.48 | <br>fold:c.97.1.1;<br>e-value:9e-59  |
| 119 | Rv3357  |  | 7.7  | 3.4 | 45 | 86.81 | <br>fold:d.306.1.1;<br>e-value:1e-27 |
| 120 | Rv3389c |  | 31.5 | 2.5 | 39 | 96.9  | <br>fold:d.38.1.4;<br>e-value:5e-60  |

|     |         |                                                                                     |      |     |    |       |                                                                                                                           |
|-----|---------|-------------------------------------------------------------------------------------|------|-----|----|-------|---------------------------------------------------------------------------------------------------------------------------|
| 121 | Rv3462c |    | 11.5 | 1.5 | 66 | 94.52 | <br>fold:b.40.4.5;<br>e-value:2e-29    |
| 122 | Rv3472  |    | 14.7 | 2.7 | 12 | 74.4  | <br>fold:d.17.4.25;<br>e-value:2e-25   |
| 123 | Rv3526  |    | 19.4 | 3.4 | 22 | 81.09 | <br>fold:b.33.1.2;<br>e-value:1e-46    |
| 124 | Rv3529c |  | 8.7  | 3.6 | 13 | 56.51 |                                                                                                                           |
| 125 | Rv3545c |  | 44   | 2.1 | 29 | 89.38 | <br>fold:a.104.1.1;<br>e-value:0.0   |
| 126 | Rv3568c |  | 40.4 | 2   | 39 | 97.67 | <br>fold:d.32.1.3;<br>e-value:1e-78  |
| 127 | Rv3569c |  | 39.3 | 1.9 | 39 | 97.25 | <br>fold:c.69.1.10;<br>e-value:e-108 |

|     |         |                                                                                     |      |     |    |       |                                                                                                                           |
|-----|---------|-------------------------------------------------------------------------------------|------|-----|----|-------|---------------------------------------------------------------------------------------------------------------------------|
| 128 | Rv3570c |    | 28.9 | 2.8 | 18 | 97.21 | <br>fold:e.6.1.1;<br>e-value:6e-88     |
| 129 | Rv3592  |    | 12.6 | 2   | 37 | 91.43 | <br>fold:d.58.4.5;<br>e-value:2e-38    |
| 130 | Rv3676  |    | 25.9 | 2.3 | 26 | 99.55 | <br>fold:b.82.3.2;<br>value:2e-58      |
| 131 | Rv3778c |   | 46.1 | 1.7 | 26 | 94.97 | <br>fold:c.67.1.3;<br>value:e-158    |
| 132 | Rv3804c |  | 50.5 | 0.6 | 82 | 83.43 | <br>fold:c.69.1.3;<br>value:e-169    |
| 133 | Rv3914  |  | 19.6 | 1.2 | 57 | 89.66 | <br>fold:c.47.1.1;<br>value:7e-51    |
| 134 | Rv2861c |  | 38.4 | 1.1 | 51 | 85.26 | <br>fold:d.127.1.1;<br>e-value:1e-70 |

|     |         |                                                                                     |      |     |    |       |                                                                                                                          |
|-----|---------|-------------------------------------------------------------------------------------|------|-----|----|-------|--------------------------------------------------------------------------------------------------------------------------|
| 135 | Rv3602c |    | 36.8 | 1.6 | 42 | 89.00 |                                                                                                                          |
| 136 | Rv3588c |    | 19.5 | 1.8 | 29 | 95.17 | <br>fold:c.53.2.1;<br>e-value:6e-60   |
| 137 | Rv2697c |   | 15.1 | 1.4 | 31 | 72.08 | <br>fold:b.85.4.1;<br>e-value:2e-57   |
| 138 | Rv1542c |  | 20.3 | 1   | 36 | 84.56 | <br>fold:a.1.1.1;<br>e-value:9e-52  |
| 139 | Rv1092c |  | 37.6 | 2.1 | 53 | 97.44 | <br>fold:c.37.1.6;<br>e-value:e-123 |
| 140 | Rv2074  |  | 14.4 | 2.4 | 13 | 89.05 | <br>fold:b.45.1.1;<br>e-value:2e-21 |

|     |         |                                                                                     |      |     |    |       |                                                                                                                           |
|-----|---------|-------------------------------------------------------------------------------------|------|-----|----|-------|---------------------------------------------------------------------------------------------------------------------------|
| 141 | Rv0967  | 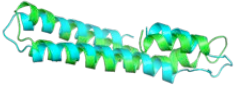   | 9.3  | 2.8 | 43 | 66.39 |                                                                                                                           |
| 142 | Rv0644c |    | 46.8 | 1.3 | 74 | 99.30 | <br>fold:c.66.1.18;<br>e-value:e-172   |
| 143 | Rv0674  |   | 10.5 | 4.3 | 17 | 93.75 |                                                                                                                           |
| 144 | Rv2220  |  | 53.1 | 1.3 | 51 | 99.16 | <br>fold:d.128.1.1;<br>e-value:0.0   |
| 145 | Rv1264  |  | 19.9 | 2.4 | 23 | 41.06 | <br>fold:d.58.29.1;<br>e-value:6e-63 |
| 146 | Rv3608c |  | 32.6 | 1.7 | 41 | 96.07 | <br>fold:c.1.21.1;<br>e-value:e-138  |

|     |         |                                                                                     |      |     |    |       |                                                                                                                           |
|-----|---------|-------------------------------------------------------------------------------------|------|-----|----|-------|---------------------------------------------------------------------------------------------------------------------------|
| 147 | Rv0432  | 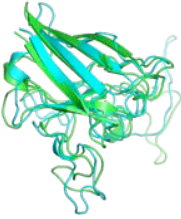   | 18.8 | 2.9 | 37 | 70.00 |                                                                                                                           |
| 148 | Rv1411c |    | 17.6 | 3   | 33 | 80.93 |                                                                                                                           |
| 149 | Rv1155  |   | 11.9 | 2.7 | 22 | 90.48 | <br>fold:b.45.1.1;<br>e-value:2e-18    |
| 150 | Rv2391  |  | 40.9 | 2.2 | 29 | 94.59 | <br>fold:d.134.1.1;<br>e-value:4e-67 |
| 151 | Rv0931c |  | 21.6 | 3.7 | 15 | 35.84 |                                                                                                                           |
| 152 | Rv1389  |  | 18.8 | 4.2 | 43 | 86.06 | <br>fold:c.37.1.1;<br>e-value:5e-80  |

|     |         |                                                                                     |      |     |    |       |                                                                                                                           |
|-----|---------|-------------------------------------------------------------------------------------|------|-----|----|-------|---------------------------------------------------------------------------------------------------------------------------|
| 153 | Rv2438c | 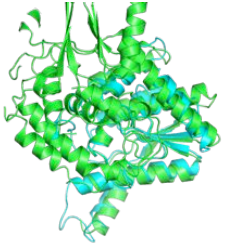   | 21.6 | 2.1 | 27 | 32.84 | <br>fold:d.160.1.2;<br>e-value:1e-34   |
| 154 | Rv3418c |    | 12   | 3.2 | 60 | 96.00 | <br>fold:b.35.1.1;<br>e-value:1e-23    |
| 155 | Rv2870c |   | 52.5 | 2.1 | 42 | 91.53 | <br>fold:d.81.1.3;<br>e-value:5e-46    |
| 156 | Rv2539c |  | 20.7 | 2   | 37 | 93.75 | <br>fold:c.37.1.2;<br>e-value:7e-18  |
| 157 | Rv3570c |  | 55.2 | 1.2 | 78 | 98.22 | <br>fold:e.6.1.1;<br>e-value:4e-43   |
| 158 | Rv2109c |  | 36.8 | 0.7 | 72 | 90.73 | <br>fold:d.153.1.4;<br>e-value:2e-72 |



|     |         |                                                                                     |      |     |    |       |                                                                                                                           |
|-----|---------|-------------------------------------------------------------------------------------|------|-----|----|-------|---------------------------------------------------------------------------------------------------------------------------|
| 159 | Rv2428  |    | 22.4 | 2.6 | 40 | 84.10 | <br>fold:c.47.1.10;<br>e-value:6e-67   |
| 160 | Rv2607  |    | 25   | 1.7 | 40 | 94.20 | <br>fold:b.45.1.1;<br>e-value:1e-94    |
| 161 | Rv0391  |   | 42.6 | 1.5 | 37 | 81.53 | <br>fold:c.67.1.3;<br>e-value:3e-38    |
| 162 | Rv2882c |  | 15   | 2   | 22 | 63.78 | <br>fold:d.67.3.1;<br>e-value:2e-94  |
| 163 | Rv3607c |  | 13.5 | 2.5 | 42 | 87.97 |                                                                                                                           |
| 164 | Rv2878c |  | 23.6 | 1.1 | 57 | 75.72 | <br>fold:c.47.1.10;<br>e-value:1e-60 |

|     |         |                                                                                     |      |     |    |       |                                                                                                                           |
|-----|---------|-------------------------------------------------------------------------------------|------|-----|----|-------|---------------------------------------------------------------------------------------------------------------------------|
| 165 | Rv2121c | 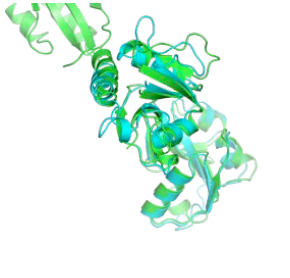   | 22.4 | 2.1 | 34 | 72.89 | <br>fold:c.94.1.1;<br>e-value:1e-95    |
| 166 | Rv1695  |    | 26.5 | 2.5 | 27 | 95.44 | <br>fold:e.52.1.1;<br>e-value:2e-65    |
| 167 | Rv2002  |   | 29.3 | 1.4 | 32 | 77.31 | <br>fold:c.2.1.2;<br>e-value:e-113     |
| 168 | Rv0938  |  | 0.4  | 2.9 | 43 | 17.65 | <br>fold:d.142.2.1;<br>e-value:4e-30 |
| 169 | Rv3809c |  | 44.8 | 1.9 | 45 | 94.74 | <br>fold:c.4.1.3;<br>e-value:3e-23   |
| 170 | Rv2996c |  | 7.7  | 2.1 | 12 | 13.83 | <br>fold:c.2.1.4;<br>e-value:2e-75   |

|     |         |                                                                                     |      |     |    |       |                                                                                                                          |
|-----|---------|-------------------------------------------------------------------------------------|------|-----|----|-------|--------------------------------------------------------------------------------------------------------------------------|
| 171 | Rv0902c | 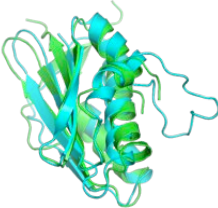   | 16.9 | 1.8 | 28 | 31.61 | <br>fold:d.122.1.3;<br>e-value:4e-26  |
| 172 | Rv2246  |    | 66.4 | 1.3 | 66 | 98.80 | <br>fold:c.95.1.1;<br>e-value:9e-83   |
| 173 | Rv1284  |   | 16.6 | 4.2 | 34 | 97.55 | <br>fold:c.53.2.1;<br>e-value:3e-34   |
| 174 | Rv2234  |  | 24.7 | 1.6 | 43 | 90.80 | <br>fold:c.44.1.1;<br>e-value:1e-68 |
| 175 | Rv2533c |  | 19   | 2.5 | 37 | 82.69 | <br>fold:a.79.1.1;<br>e-value:4e-25 |
| 176 | Rv3227  |  | 52.4 | 1.8 | 31 | 91.78 | <br>fold:d.68.2.2;<br>e-value:e-179 |

|     |         |                                                                                     |      |     |    |       |                                                                                                                           |
|-----|---------|-------------------------------------------------------------------------------------|------|-----|----|-------|---------------------------------------------------------------------------------------------------------------------------|
| 177 | Rv2122c | 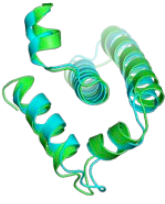   | 14.1 | 1.2 | 25 | 90.32 |                                                                                                                           |
| 178 | Rv2192c |    | 39.5 | 2   | 42 | 91.89 | <br>fold:c.27.1.1;<br>e-value:4e-86    |
| 179 | Rv2540c |   | 49.4 | 1.8 | 45 | 96.76 | <br>fold:d.258.1.1;<br>e-value:e-118   |
| 180 | Rv0062  |  | 39   | 1.6 | 41 | 74.74 |                                                                                                                           |
| 181 | Rv3106  |  | 47.8 | 2   | 40 | 98.68 | <br>fold:c.3.1.1;<br>e-value:e-107   |
| 182 | Rv0262c |  | 8.5  | 2.8 | 17 | 80.66 | <br>fold:d.108.1.1;<br>e-value:9e-23 |

|     |         |                                                                                     |      |     |    |       |                                                                                                                           |
|-----|---------|-------------------------------------------------------------------------------------|------|-----|----|-------|---------------------------------------------------------------------------------------------------------------------------|
| 183 | Rv0046c | 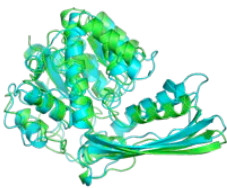   | 29.3 | 2.7 | 30 | 94.82 | <br>fold:c.2.1.3;<br>e-value:1e-45     |
| 184 | Rv0129c |    | 47.2 | 1.2 | 70 | 84.12 | <br>fold:c.69.1.3;<br>e-value:6e-09    |
| 185 | Rv1143  |   | 40.1 | 1.3 | 58 | 95.83 | <br>fold:c.123.1.1;<br>e-value:e-120   |
| 186 | Rv3214  |  | 20.4 | 2.6 | 26 | 97.54 | <br>fold:c.60.1.1;<br>e-value:5e-63  |
| 187 | Rv0793  |  | 14.9 | 1.1 | 18 | 89.11 | <br>fold:d.58.4.11;<br>e-value:4e-26 |
| 188 | Rv0533c |  | 49.1 | 1.2 | 46 | 97.91 | <br>fold:c.95.1.2;<br>e-value:3e-77  |

|     |         |                                                                                     |      |     |    |        |                                                                                                                           |
|-----|---------|-------------------------------------------------------------------------------------|------|-----|----|--------|---------------------------------------------------------------------------------------------------------------------------|
| 189 | Rv1626  | 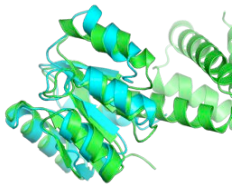   | 18   | 1.9 | 32 | 57.56  | <br>fold:c.23.1.1;<br>e-value:3e-27    |
| 190 | Rv2763c |    | 29.4 | 0.7 | 72 | 98.74  | <br>fold:c.71.1.1;<br>e-value:3e-34    |
| 191 | Rv2445c |   | 25   | 0.9 | 52 | 97.06  | <br>fold:d.58.6.1;<br>e-value:5e-63    |
| 192 | Rv2537c |  | 23.8 | 1.2 | 41 | 99.32  | <br>fold:c.23.13.1;<br>e-value:5e-81 |
| 193 | Rv2238c |  | 24.1 | 1.7 | 30 | 100.00 | <br>fold:c.47.1.10;<br>e-value:1e-44 |
| 194 | Rv0503c |  | 44.6 | 0.9 | 57 | 96.03  | <br>fold:c.66.1.18;<br>e-value:8e-15 |

|     |         |                                                                                     |      |     |    |       |                                                                                                                           |
|-----|---------|-------------------------------------------------------------------------------------|------|-----|----|-------|---------------------------------------------------------------------------------------------------------------------------|
| 195 | Rv1483  | 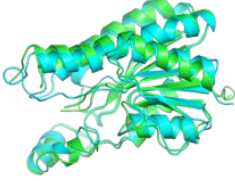   | 30.9 | 1.5 | 34 | 93.12 | <br>fold:c.2.1.2;<br>e-value:2e-60     |
| 196 | Rv2461c |    | 28.1 | 1.4 | 55 | 88.00 |                                                                                                                           |
| 197 | Rv0390  |   | 16.4 | 2   | 28 | 99.29 | <br>fold:c.46.1.3;<br>e-value:5e-06    |
| 198 | Rv3361c |  | 19.3 | 1.8 | 23 | 81.42 | <br>fold:b.80.8.1;<br>e-value:8e-61  |
| 199 | Rv1009  |  | 6    | 3.1 | 19 | 25.97 |                                                                                                                           |
| 200 | Rv2429  |  | 5    | 2.2 | 27 | 42.37 | <br>fold:a.152.1.1;<br>e-value:2e-20 |

|     |         |                                                                                     |      |     |    |       |                                                                                                                          |
|-----|---------|-------------------------------------------------------------------------------------|------|-----|----|-------|--------------------------------------------------------------------------------------------------------------------------|
| 201 | Rv3048c |    | 46.2 | 0.9 | 74 | 87.65 | <br>fold:a.25.1.2;<br>e-value:e-153   |
| 202 | Rv3875  |    | 8    | 2.9 | 17 | 91.58 |                                                                                                                          |
| 203 | Rv1170  |   | 17.2 | 2.7 | 30 | 94.06 |                                                                                                                          |
| 204 | Rv1372  |  | 45.5 | 2.1 | 31 | 90.59 | <br>fold:c.95.1.2;<br>e-value:5e-89 |
| 205 | Rv1596  |  | 30.4 | 1.6 | 33 | 96.14 | <br>fold:c.1.17.1;<br>e-value:3e-58 |
| 206 | Rv2717c |  | 22.2 | 1.5 | 32 | 96.95 | <br>fold:b.60.1.8;<br>e-value:8e-76 |



|     |         |                                                                                     |      |     |    |       |                                                                                                                           |
|-----|---------|-------------------------------------------------------------------------------------|------|-----|----|-------|---------------------------------------------------------------------------------------------------------------------------|
| 207 | Rv1416  |    | 26.4 | 1   | 47 | 91.25 | <br>fold:c.16.1.1;<br>e-value:9e-59    |
| 208 | Rv0983  |    | 13.7 | 1.4 | 18 | 19.83 |                                                                                                                           |
| 209 | Rv3247c |   | 21.1 | 2.3 | 26 | 96.73 | <br>fold:c.37.1.1;<br>e-value:1e-50    |
| 210 | Rv0462  |  | 5.7  | 2.8 | 20 | 34.48 | <br>fold:c.3.1.5;<br>e-value:6e-62   |
| 211 | Rv0470c |  | 41.9 | 1   | 73 | 98.61 | <br>fold:c.66.1.18;<br>e-value:e-172 |
| 212 | Rv1837c |  | 31.4 | 2.9 | 58 | 97.71 | <br>fold:c.1.13.1;<br>e-value:0.0    |

|     |         |                                                                                     |      |     |    |       |                                                                                                                           |
|-----|---------|-------------------------------------------------------------------------------------|------|-----|----|-------|---------------------------------------------------------------------------------------------------------------------------|
| 213 | Rv2110c | 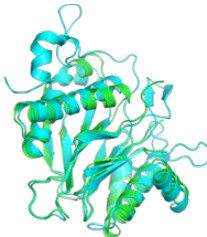   | 29   | 1.6 | 67 | 87.63 | <br>fold:d.153.1.4;<br>e-value:e-128   |
| 214 | Rv0137c |    | 26.1 | 1.7 | 43 | 90.11 | <br>fold:d.58.28.1;<br>e-value:1e-76   |
| 215 | Rv0058  |   | 20.8 | 1.1 | 40 | 12.81 |                                                                                                                           |
| 216 | Rv1314c |  | 21.6 | 1.8 | 37 | 79.27 | <br>fold:a.25.2.2;<br>e-value:3e-34  |
| 217 | Rv1636  |  | 12.6 | 1.5 | 25 | 95.89 |                                                                                                                           |
| 218 | Rv1885c |  | 15.2 | 2.4 | 23 | 64.82 | <br>fold:a.130.1.4;<br>e-value:9e-33 |

|     |         |                                                                                     |      |     |    |       |                                                                                                                            |
|-----|---------|-------------------------------------------------------------------------------------|------|-----|----|-------|----------------------------------------------------------------------------------------------------------------------------|
| 219 | Rv3710  | 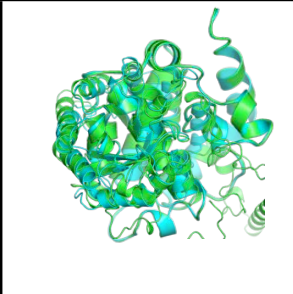   | 33.5 | 2.1 | 25 | 44.88 | <br>fold:c.1.10.5;<br>e-value:3e-71     |
| 220 | Rv3280  |    | 55.6 | 0.9 | 69 | 96.35 | <br>fold:c.14.1.4;<br>e-value:e-150     |
| 221 | Rv1848  |   | 19.1 | 0.9 | 65 | 99.00 | <br>fold:d.8.1.1;<br>e-value:3e-34      |
| 222 | Rv2965c |  | 25   | 1.6 | 42 | 96.89 | <br>fold:c.26.1.3;<br>e-value:6e-62   |
| 223 | Rv1710  |  | 6    | 3.5 | 31 | 68.40 | <br>fold: a.4.5.60; e<br>value: 5e-32 |
| 224 | Rv1098c |  | 53   | 1.6 | 51 | 95.99 | <br>fold:a.127.1.1;<br>e-value:4e-62  |

|     |         |                                                                                     |      |     |    |       |                                                                                                                          |
|-----|---------|-------------------------------------------------------------------------------------|------|-----|----|-------|--------------------------------------------------------------------------------------------------------------------------|
| 225 | Rv2754c | 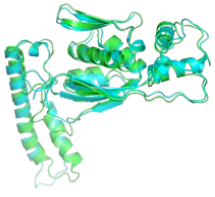   | 28.4 | 2.2 | 64 | 97.20 | <br>fold:d.207.1.1;<br>e-value:7e-45  |
| 226 | Rv2626c |    | 17.2 | 2.1 | 19 | 86.01 | <br>fold:d.37.1.1;<br>e-value:2e-12   |
| 227 | Rv1654  |    | 38.4 | 2   | 45 | 95.58 | <br>fold:c.73.1.2;<br>e-value:e-142   |
| 228 | Rv1677  |  | 23.2 | 1.2 | 56 | 69.78 |                                                                                                                          |
| 229 | Rv1625c |  | 18.4 | 2.5 | 24 | 39.50 |                                                                                                                          |
| 230 | Rv2883c |  | 34.6 | 1.6 | 46 | 88.51 | <br>fold:c.73.1.3;<br>e-value:2e-48 |

|     |         |                                                                                     |      |     |    |       |                                                                                                                          |
|-----|---------|-------------------------------------------------------------------------------------|------|-----|----|-------|--------------------------------------------------------------------------------------------------------------------------|
| 231 | Rv1886c | 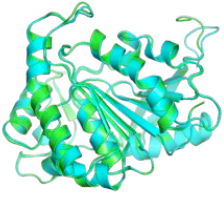   | 50.7 | 0.8 | 82 | 87.69 | <br>fold:c.69.1.3;<br>e-value:3e-20   |
| 232 | Rv0736  |    | 1.5  | 2.6 | 26 | 64.00 |                                                                                                                          |
| 233 | Rv2841c |   | 1.5  | 3.3 | 24 | 15.85 | <br>fold:d.202.1.1;<br>e-value:2e-34  |
| 234 | Rv3803c |  | 37.4 | 1.7 | 42 | 87.63 | <br>fold:c.69.1.3;<br>e-value:5e-14 |
| 235 | Rv0934  |  | 41   | 2   | 32 | 85.83 |                                                                                                                          |
| 236 | Rv3853  |  | 28.1 | 1   | 45 | 95.54 | <br>fold:c.8.7.1;<br>e-value:3e-36  |

|     |         |                                                                                     |      |     |    |       |                                                                                                                           |
|-----|---------|-------------------------------------------------------------------------------------|------|-----|----|-------|---------------------------------------------------------------------------------------------------------------------------|
| 237 | Rv2793c | 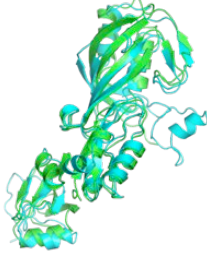   | 24.2 | 2.1 | 34 | 95.97 | <br>fold:d.265.1.2;<br>e-value:1e-80   |
| 238 | Rv1484  |    | 20   | 2.3 | 15 | 72.12 | <br>fold:c.2.1.2;<br>e-value:e-123     |
| 239 | Rv2245  |    | 59.5 | 2.2 | 40 | 96.88 | fold:c.95.1.1;<br>e-value:e-129                                                                                           |
| 240 | Rv3307  |  | 37.6 | 1.7 | 58 | 99.63 | <br>fold:c.56.2.1;<br>e-value:e-146  |
| 241 | Rv0491  |  | 16.5 | 1.5 | 45 | 44.05 | <br>fold:c.23.1.1;<br>e-value:8e-48  |
| 242 | Rv2465c |  | 24.4 | 1.5 | 36 | 91.98 | <br>fold:c.121.1.1;<br>e-value:1e-32 |

|     |         |                                                                                     |      |     |    |       |                                                                                                                         |
|-----|---------|-------------------------------------------------------------------------------------|------|-----|----|-------|-------------------------------------------------------------------------------------------------------------------------|
| 243 | Rv0760c | 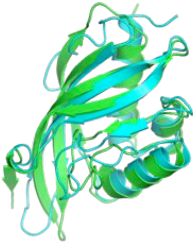   | 17   | 2.2 | 24 | 96.40 | <br>fold:d.17.4.3;<br>e-value:2e-10  |
| 244 | Rv2945c |    | 17.6 | 2.8 | 31 | 88.41 | <br>fold:b.125.1.3;<br>e-value:2e-33 |
| 245 | Rv2925c |   | 23.3 | 1.2 | 44 | 60.83 | <br>fold:a.149.1.1;<br>e-value:3e-29 |
| 246 | Rv1900c |  | 23.5 | 2.2 | 29 | 36.15 |                                                                                                                         |
| 247 | Rv2217  |  | 29.4 | 1.7 | 43 | 88.70 |                                                                                                                         |
| 248 | Rv3356c |  | 39.1 | 1.7 | 43 | 99.64 | <br>fold:c.2.1.7;<br>e-value:5e-58 |

|     |         |                                                                                     |      |     |    |       |                                                                                                                          |
|-----|---------|-------------------------------------------------------------------------------------|------|-----|----|-------|--------------------------------------------------------------------------------------------------------------------------|
| 249 | Rv2543  | 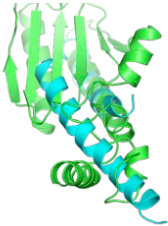   | 0.2  | 4   | 25 | 25.11 |                                                                                                                          |
| 250 | Rv2118c |    | 13.5 | 2.5 | 14 | 51.79 | <br>fold:c.66.1.13;<br>e-value:6e-09  |
| 251 | Rv2711  |   | 7.6  | 2.7 | 23 | 30.00 | <br>fold:a.76.1.1;<br>e-value:9e-32   |
| 252 | Rv0548c |  | 25.2 | 1.7 | 34 | 74.20 | <br>fold:c.14.1.3;<br>e-value:4e-98 |
| 253 | Rv2470  |  | 21.7 | 0.8 | 59 | 96.88 | <br>fold:a.1.1.1;<br>e-value:3e-39  |
| 254 | Rv3710  |  | 33.2 | 2.1 | 25 | 44.88 | <br>fold:c.1.10.5;<br>e-value:3e-71 |



|     |         |                                                                                     |      |     |    |        |                                                                                                                          |
|-----|---------|-------------------------------------------------------------------------------------|------|-----|----|--------|--------------------------------------------------------------------------------------------------------------------------|
| 255 | Rv2995c | 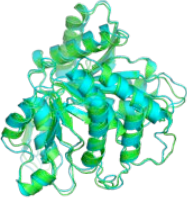   | 45.4 | 1.9 | 41 | 99.70  | <br>fold:c.77.1.1;<br>e-value:e-147   |
| 256 | Rv2150c |    | 48.1 | 1.2 | 66 | 80.47  | <br>fold:c.32.1.1;<br>e-value:8e-23   |
| 257 | Rv1267c |   | 8.2  | 2.2 | 16 | 22.68  |                                                                                                                          |
| 258 | Rv0903c |  | 19.3 | 1.6 | 29 | 51.07  | <br>fold:c.23.1.1;<br>e-value:6e-63 |
| 259 | Rv3303c |  | 18.6 | 2.2 | 23 | 32.25  | <br>fold:c.3.1.5;<br>e-value:2e-39  |
| 260 | Rv0733  |  | 29.6 | 1.2 | 45 | 100.00 | <br>fold:c.37.1.1;<br>e-value:3e-80 |

|     |         |                                                                                     |      |     |    |       |                                                                                                                          |
|-----|---------|-------------------------------------------------------------------------------------|------|-----|----|-------|--------------------------------------------------------------------------------------------------------------------------|
| 261 | Rv2225  | 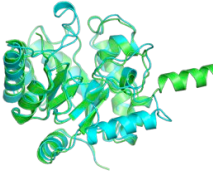   | 33.9 | 1.8 | 48 | 93.59 |                                                                                                                          |
| 262 | Rv2498c |    | 29.6 | 1.6 | 32 | 77.66 |                                                                                                                          |
| 263 | Rv2773c |   | 2.7  | 2.5 | 21 | 24.90 | <br>fold:d.81.1.3;<br>e-value:4e-34   |
| 264 | Rv0440  |  | 30.5 | 1.3 | 64 | 35.93 | <br>fold:i.16.1.1;<br>e-value:0.0   |
| 265 | Rv2991  |  | 14.5 | 2   | 24 | 80.98 | <br>fold:b.45.1.1;<br>e-value:4e-27 |
| 266 | Rv3628  |  | 26.7 | 1.3 | 47 | 96.30 | <br>fold:b.40.5.1;<br>e-value:2e-73 |

|     |         |                                                                                     |      |     |    |       |                                                                                                                           |
|-----|---------|-------------------------------------------------------------------------------------|------|-----|----|-------|---------------------------------------------------------------------------------------------------------------------------|
| 267 | Rv1700  | 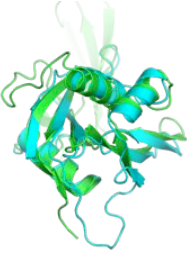   | 16   | 1.7 | 29 | 66.18 | <br>fold:d.113.1.1;<br>e-value:9e-40   |
| 268 | Rv3855  |    | 14.1 | 3.5 | 17 | 83.80 | <br>fold:a.121.1.1;<br>e-value:3e-47   |
| 269 | Rv2911  |   | 35.6 | 1.5 | 32 | 83.85 |                                                                                                                           |
| 270 | Rv0467  |  | 60.1 | 0.6 | 67 | 95.56 | <br>fold:c.1.12.7;<br>e-value:0.0    |
| 271 | Rv3392c |  | 46.7 | 1.3 | 74 | 99.30 | <br>fold:c.66.1.18;<br>e-value:e-166 |
| 272 | Rv0009  |  | 27.6 | 1.4 | 51 | 91.21 | <br>fold:b.62.1.1;<br>e-value:5e-63  |

|     |         |                                                                                     |      |     |    |       |                                                                                                                           |
|-----|---------|-------------------------------------------------------------------------------------|------|-----|----|-------|---------------------------------------------------------------------------------------------------------------------------|
| 273 | Rv0642c | 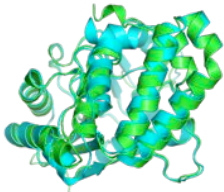   | 40.1 | 1.7 | 57 | 92.69 | <br>fold:c.66.1.18;<br>e-value:2e-18   |
| 274 | Rv1293  |    | 45.5 | 1.9 | 31 | 96.64 | <br>fold:c.1.6.1;<br>e-value:4e-44     |
| 275 | Rv3240c |   | 44.7 | 2.9 | 51 | 88.20 | <br>fold:c.37.1.19;<br>e-value:e-112   |
| 276 | Rv0216  |  | 10.4 | 2.7 | 17 | 44.21 |                                                                                                                           |
| 277 | Rv3846  |  | 32   | 0.8 | 64 | 94.69 | <br>fold:d.44.1.1;<br>e-value:1e-45  |
| 278 | Rv2276  |  | 42.9 | 2.2 | 25 | 95.45 | <br>fold:a.104.1.1;<br>e-value:e-104 |

|     |         |                                                                                     |      |     |    |       |                                                                                                                           |
|-----|---------|-------------------------------------------------------------------------------------|------|-----|----|-------|---------------------------------------------------------------------------------------------------------------------------|
| 279 | Rv0819  | 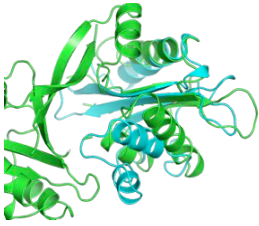   | 6.3  | 2.5 | 16 | 36.83 | <br>fold:d.108.1.1;<br>e-value:6e-34   |
| 280 | Rv1347c |    | 23.2 | 1.6 | 25 | 81.43 | <br>fold:d.108.1.1;<br>e-value:5e-16   |
| 281 | Rv1908c |    | 67.7 | 1   | 68 | 95.68 | <br>fold:a.93.1.3;<br>e-value:0.0      |
| 282 | Rv3465  |  | 31.4 | 1.2 | 49 | 95.54 | <br>fold:b.82.1.1;<br>e-value:e-108  |
| 283 | Rv1932  |  | 22   | 1.8 | 52 | 98.18 | <br>fold:c.47.1.10;<br>e-value:8e-44 |
| 284 | Rv3913  |  | 38.4 | 1.7 | 38 | 90.45 | <br>fold:c.3.1.5;<br>e-value:6e-16   |

|     |         |                                                                                     |      |     |    |       |                                                                                                                          |
|-----|---------|-------------------------------------------------------------------------------------|------|-----|----|-------|--------------------------------------------------------------------------------------------------------------------------|
| 285 | Rv3607c | 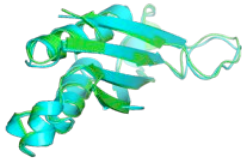   | 20.1 | 1   | 42 | 87.97 |                                                                                                                          |
| 286 | Rv3423c |    | 46.2 | 1.5 | 48 | 94.56 | <br>fold:c.1.6.1;<br>e-value:1e-83    |
| 287 | Rv2714  |   | 34.3 | 2   | 46 | 81.79 | <br>fold:c.56.8.1;<br>e-value:3e-87   |
| 288 | Rv1379  |  | 24.2 | 1.5 | 53 | 93.26 | <br>fold:c.61.1.1;<br>e-value:1e-17 |
| 289 | Rv1094  |  | 20.7 | 2.3 | 23 | 92.00 | <br>fold:a.25.1.2;<br>e-value:1e-84 |
| 290 | Rv0489  |  | 33.7 | 1.4 | 51 | 89.56 | <br>fold:c.60.1.1;<br>e-value:e-126 |
