# Supplementary material for: Structural Annotation of Mycobacterium tuberculosis Proteome
Source: PubMed Central journal article supplement (PMC3205055; doi:10.1371/journal.pone.0027044), 2011-10-31
Supplement: pone.0027044.s016.pdf [file pone.0027044.s016.pdf]

| Sl. No | Figure                                                                              | Protein | PDBID | Chain | Pocket ID | Lig ID | PMIN Score | PMAX Score |
|--------|-------------------------------------------------------------------------------------|---------|-------|-------|-----------|--------|------------|------------|
| 1      | 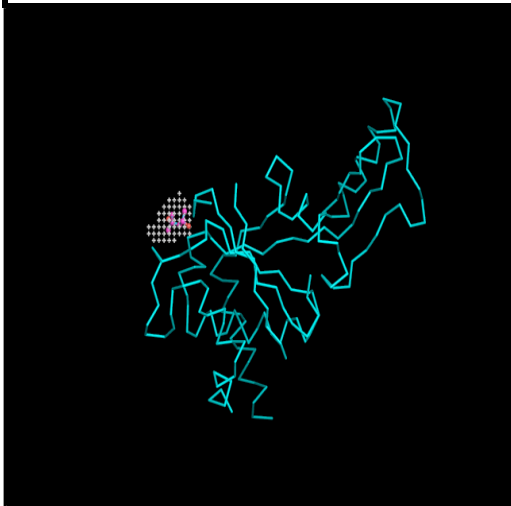   | Rv0005  | 3m4i  | A     | r1        | MPD    | 1          | 0.387      |
| 2      |   | Rv0046c | 1gr0  | A     | r1        | NAD    | 0.967      | 0.517      |
| 3      |  | Rv0062  | 1uoz  | A     | r17       | GLC    | 0.507      | 0.255      |

4

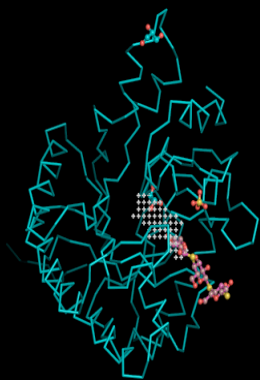

Rv0062

1uoz

A

r3

GLC

0.903

0.164

5

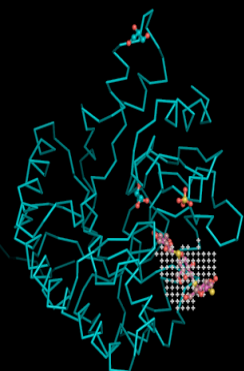

Rv0062

1uoz

A

r5

GLC

0.823

0.261

6

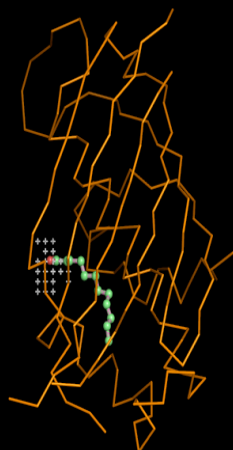

Rv0098

2pfc

A

r5

PLM

0.64

0.429

7

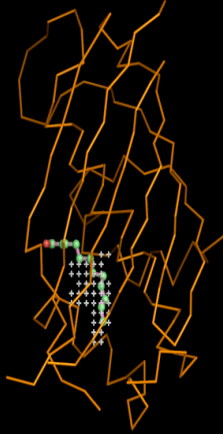

Rv0098

2pfc

A

r7

PLM

0.955

0.262

8

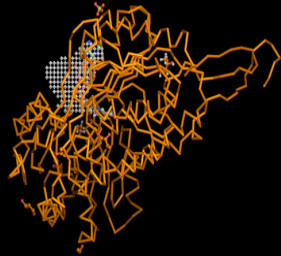

Rv0223c

3b4w

A

r2

NAD

0.973

0.352

9

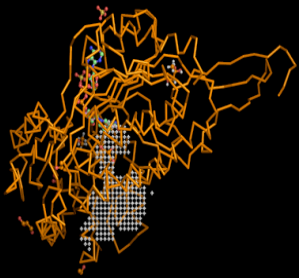

Rv0223c

3b4w

A

r3

NAD

0.857

0.27

10

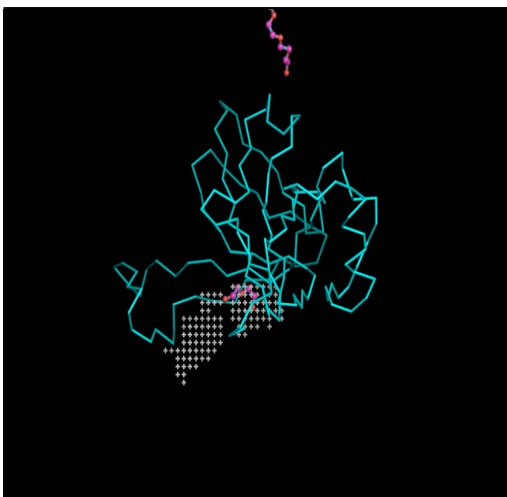

Rv0321

2qlp

A

r4

TTP

0.404

0.265

11

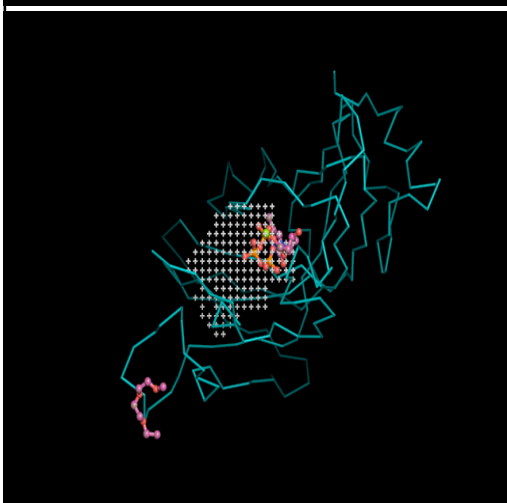

Rv0321

2qxx

A

r2

TTP

1

0.173

12

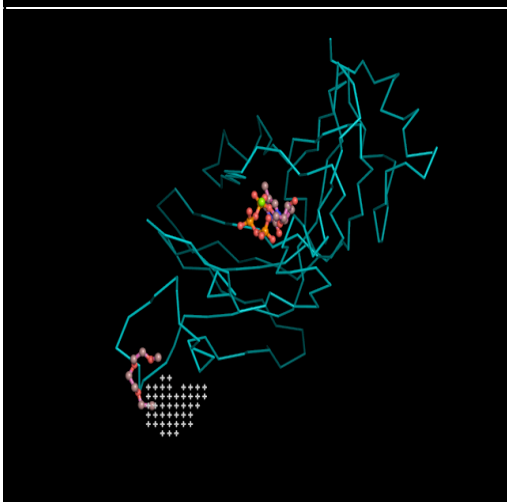

Rv0321

2qxx

A

r4

TTP

0.375

0.069

13

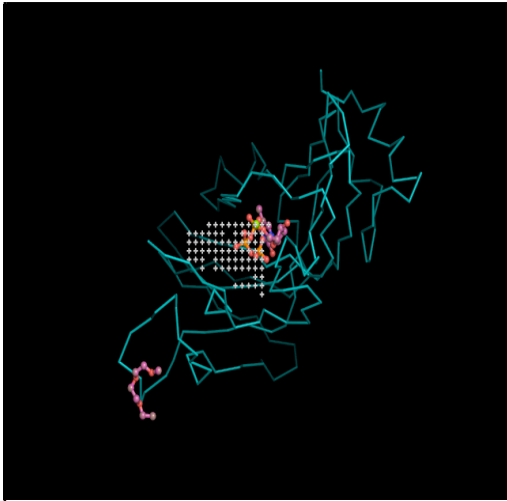

Rv0321

2qxx

A

r8

TTP

0.468

0.205

14

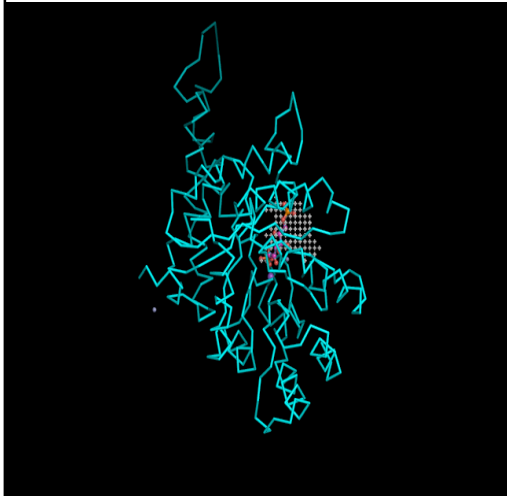

Rv0363c

3elf

A

r4

2FP

0.802

0.48

15

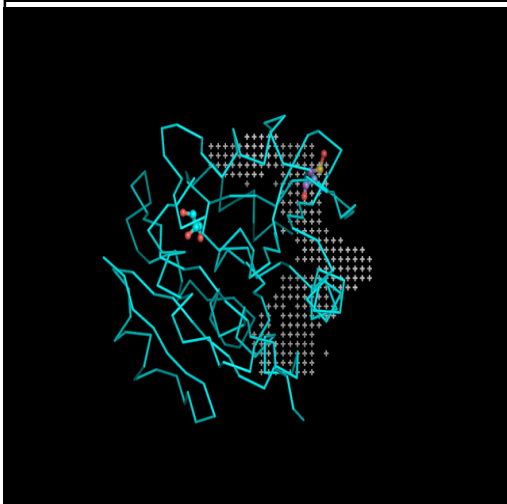

Rv0371c

2wee

A

r10

CSO

1

0.011

16

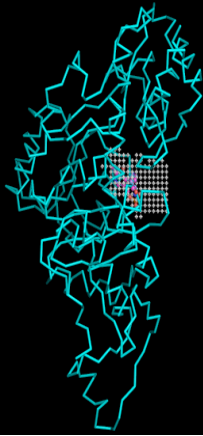

Rv0391

3ndn

A

r3

LLP

0.898

0.288

17

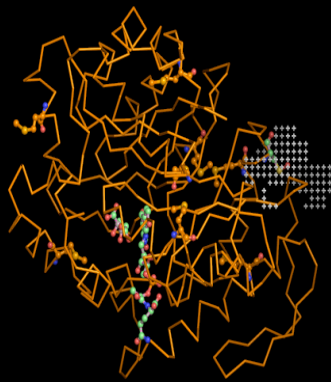

Rv0407

3b4y

A

r17

F42

0.456

0.398

18

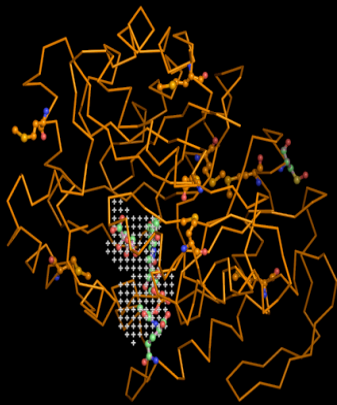

Rv0407

3b4y

A

r4

F42

0.904

0.391

19

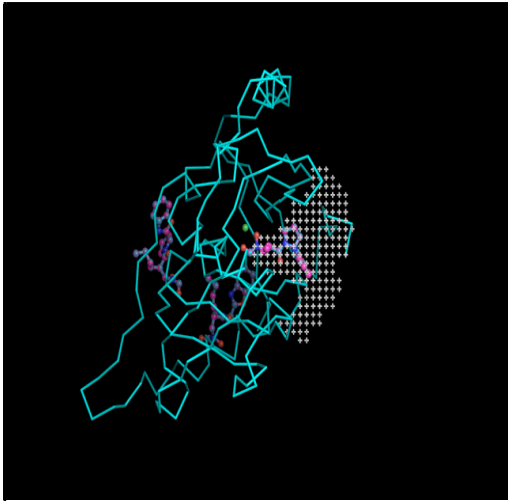

|         |      |   |    |     |       |       |
|---------|------|---|----|-----|-------|-------|
| Rv0429c | 3e3u | A | r2 | NVC | 0.685 | 0.435 |
|---------|------|---|----|-----|-------|-------|

20

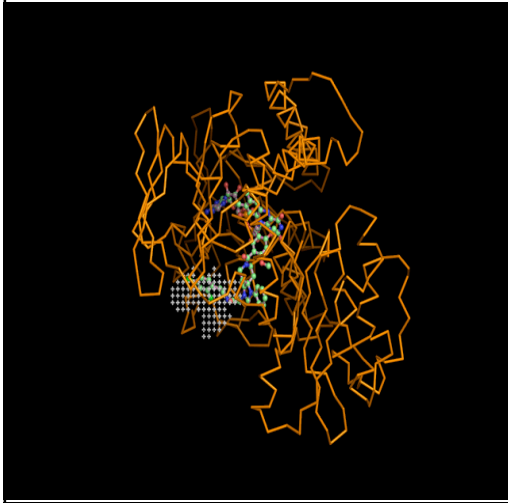

|        |      |   |    |     |       |       |
|--------|------|---|----|-----|-------|-------|
| Rv0462 | 3ii4 | A | r3 | 3II | 0.721 | 0.368 |
|--------|------|---|----|-----|-------|-------|

21

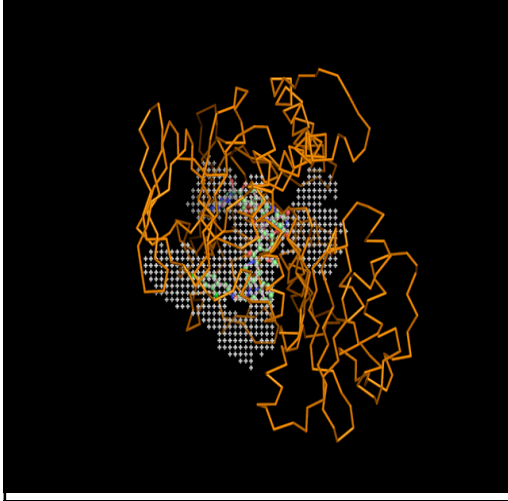

|        |      |   |    |     |   |       |
|--------|------|---|----|-----|---|-------|
| Rv0462 | 3ii4 | A | r4 | FAD | 1 | 0.086 |
|--------|------|---|----|-----|---|-------|

22

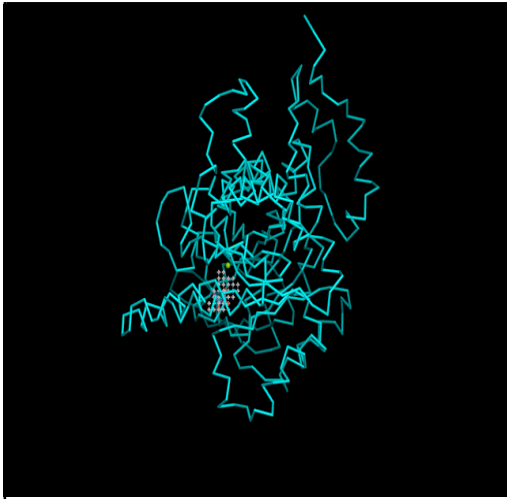

|        |      |   |    |     |   |       |
|--------|------|---|----|-----|---|-------|
| Rv0467 | 1f8m | A | r3 | PYR | 1 | 0.193 |
|--------|------|---|----|-----|---|-------|

23

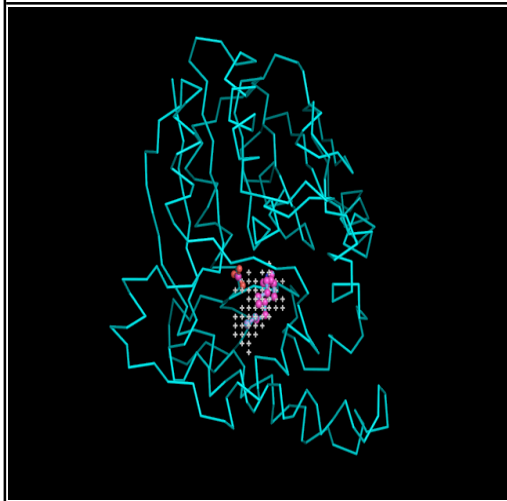

|         |      |   |    |     |   |      |
|---------|------|---|----|-----|---|------|
| Rv0503c | 3hem | A | r2 | D22 | 1 | 0.24 |
|---------|------|---|----|-----|---|------|

24

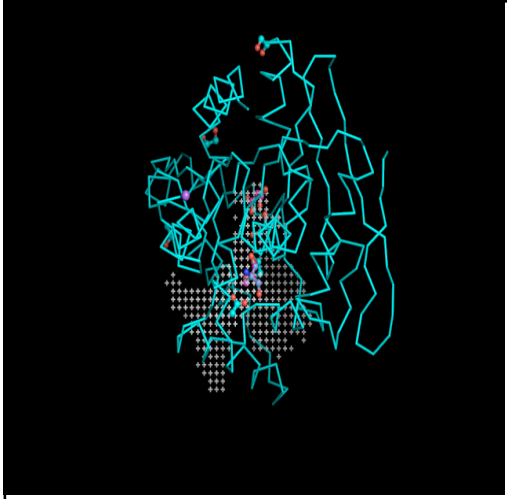

|        |      |   |    |     |   |      |
|--------|------|---|----|-----|---|------|
| Rv0554 | 3hss | A | r1 | TRS | 1 | 0.02 |
|--------|------|---|----|-----|---|------|



25

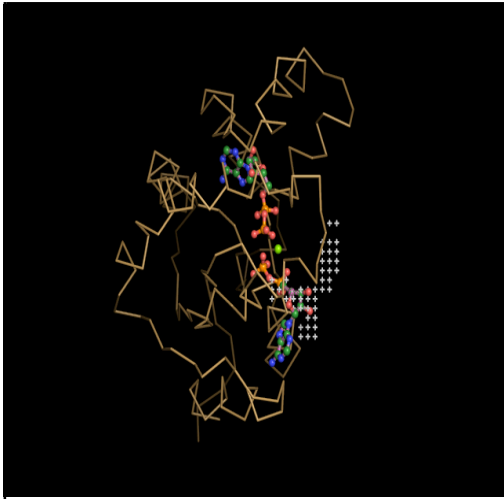

Rv0733

2cdn

A

r13

ADP

0.913

0.112

26

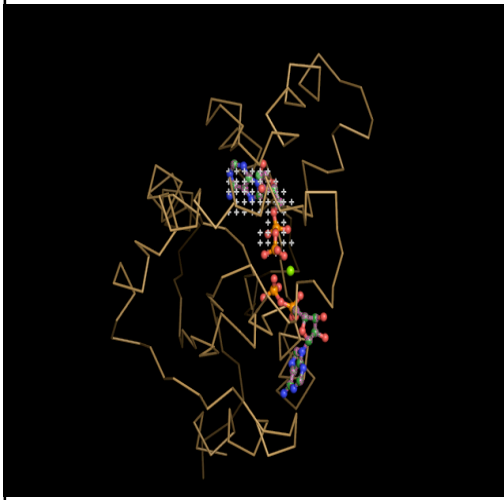

Rv0733

2cdn

A

r2

ADP

0.693

0.468

27

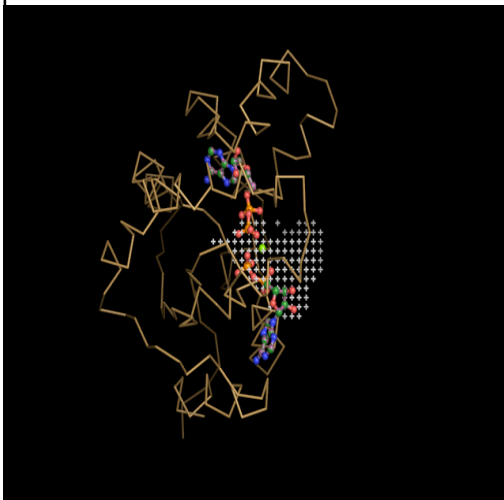

Rv0733

2cdn

A

r3

ADP

0.653

0.414

28

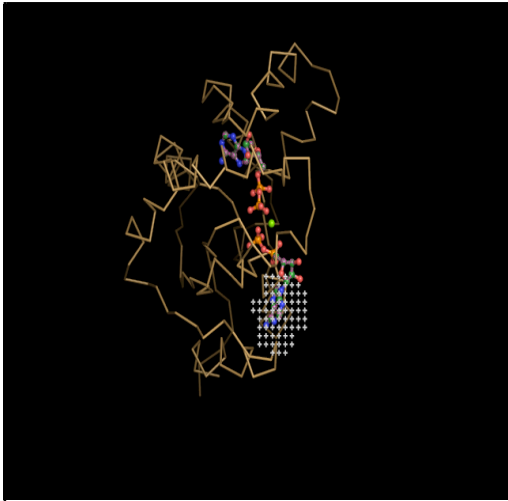

|        |      |   |    |     |       |       |
|--------|------|---|----|-----|-------|-------|
| Rv0733 | 2cdn | A | r4 | ADP | 0.824 | 0.141 |
|--------|------|---|----|-----|-------|-------|

29

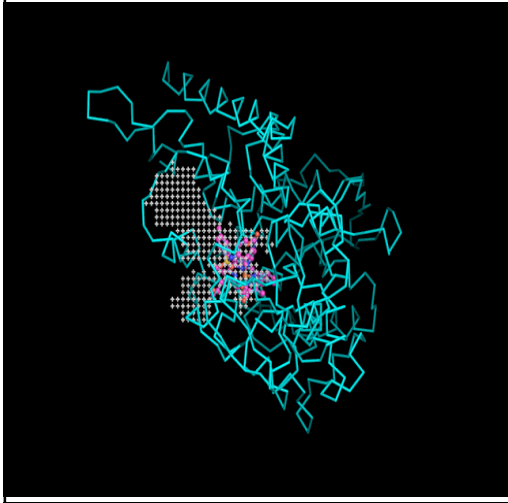

|         |      |   |    |     |       |       |
|---------|------|---|----|-----|-------|-------|
| Rv0764c | 2w0b | A | r2 | HEM | 0.997 | 0.166 |
|---------|------|---|----|-----|-------|-------|

30

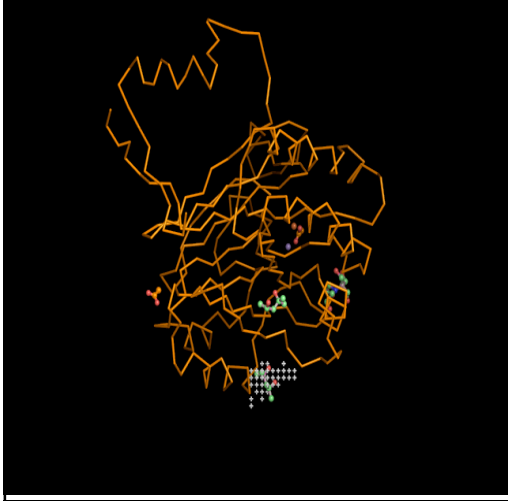

|        |      |   |     |     |      |      |
|--------|------|---|-----|-----|------|------|
| Rv0805 | 3ib7 | A | r17 | MPD | 0.48 | 0.29 |
|--------|------|---|-----|-----|------|------|

31

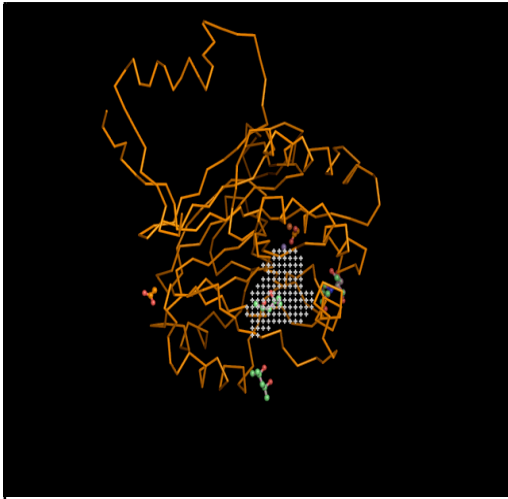

|        |      |   |    |     |       |       |
|--------|------|---|----|-----|-------|-------|
| Rv0805 | 3ib7 | A | r3 | MPD | 0.556 | 0.216 |
|--------|------|---|----|-----|-------|-------|

32

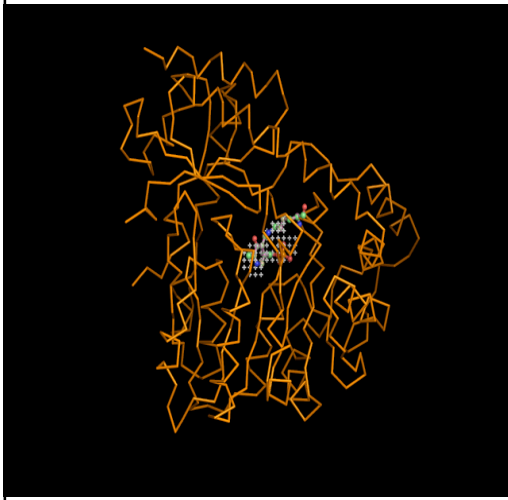

|         |      |   |     |     |       |       |
|---------|------|---|-----|-----|-------|-------|
| Rv0858c | 2o0r | A | r21 | LLP | 0.692 | 0.665 |
|---------|------|---|-----|-----|-------|-------|

33

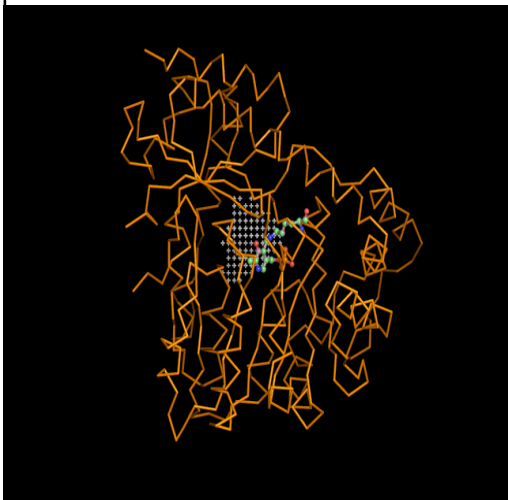

|         |      |   |    |     |       |       |
|---------|------|---|----|-----|-------|-------|
| Rv0858c | 2o0r | A | r4 | LLP | 0.474 | 0.456 |
|---------|------|---|----|-----|-------|-------|

34

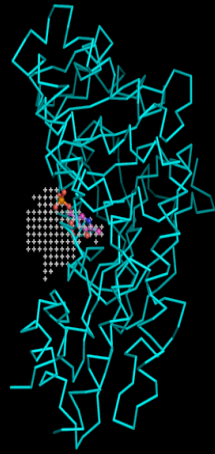

Rv0884c

2fyf

A

r11

PLP

0.957

0.235

35

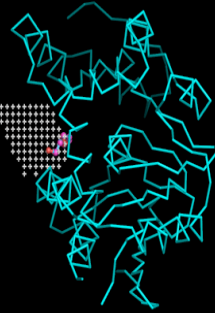

Rv0905

3he2

A

r1

PGE

1

0.201

36

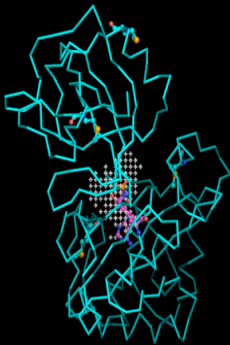

Rv0938

1vs0

A

r1

APK

0.929

0.565

37

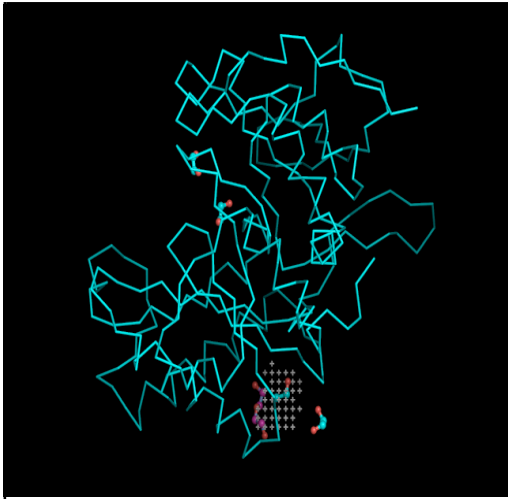

|        |      |   |     |     |       |       |
|--------|------|---|-----|-----|-------|-------|
| Rv0938 | 2r9l | A | r16 | APK | 0.443 | 0.147 |
|--------|------|---|-----|-----|-------|-------|

38

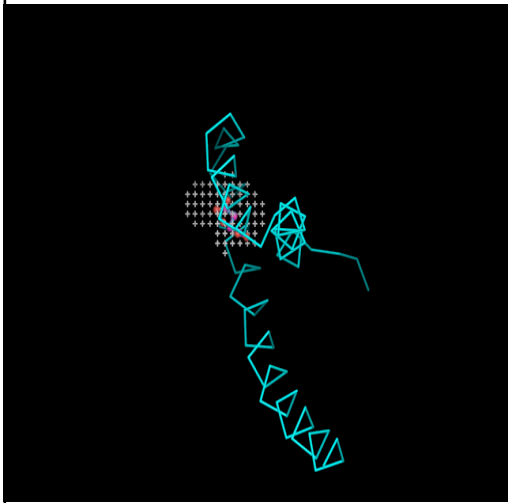

|         |      |   |    |     |   |       |
|---------|------|---|----|-----|---|-------|
| Rv0948c | 2vkl | A | r1 | MLT | 1 | 0.092 |
|---------|------|---|----|-----|---|-------|

39

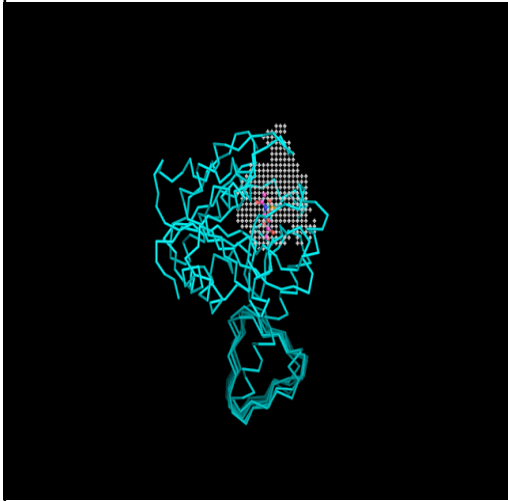

|         |      |   |    |     |       |       |
|---------|------|---|----|-----|-------|-------|
| Rv1018c | 2qkx | A | r1 | UD1 | 0.984 | 0.188 |
|---------|------|---|----|-----|-------|-------|

|                                                                                               |         |      |   |    |     |       |       |
|-----------------------------------------------------------------------------------------------|---------|------|---|----|-----|-------|-------|
| <p>40</p>    | Rv1018c | 3dj4 | A | r1 | UD1 | 1     | 0.23  |
| <p>41</p>   | Rv1086  | 2vg0 | A | r1 | GPP | 0.63  | 0.489 |
| <p>42</p>  | Rv1086  | 2vg0 | A | r3 | GPP | 0.721 | 0.433 |

43

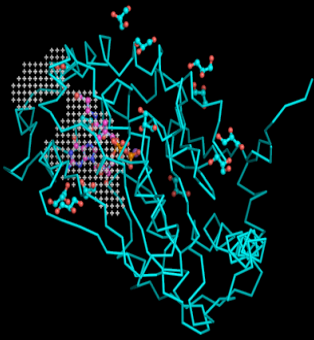

Rv1092c

3aez

A

r1

GDP

0.972

0.08

44

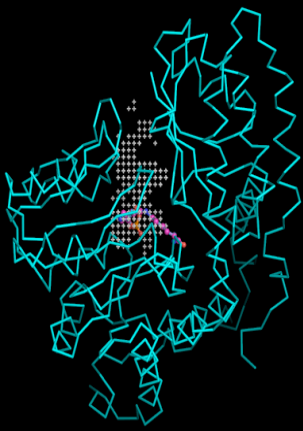

Rv1093

3h7f

A

r12

LLP

0.852

0.253

45

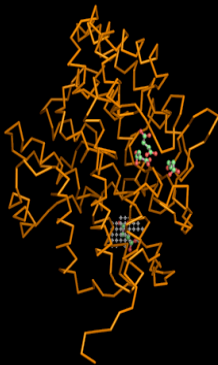

Rv1131

3hwk

A

r14

SIN

0.776

0.076

46

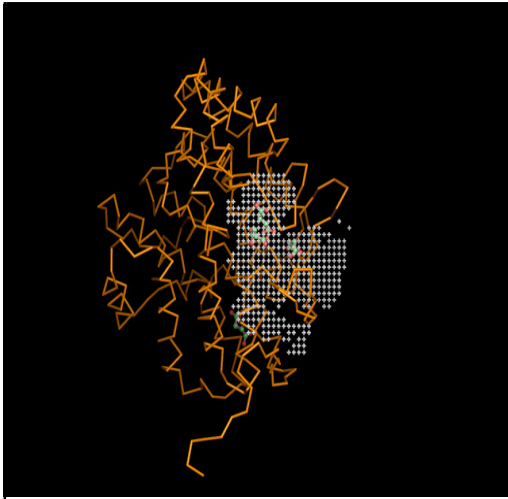

|        |      |   |    |     |       |       |
|--------|------|---|----|-----|-------|-------|
| Rv1131 | 3hwk | A | r3 | SIN | 0.848 | 0.133 |
|--------|------|---|----|-----|-------|-------|

47

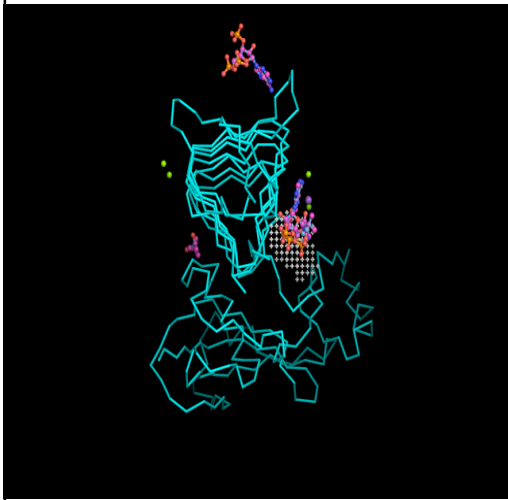

|         |      |   |     |     |       |       |
|---------|------|---|-----|-----|-------|-------|
| Rv1201c | 3fsy | A | r12 | SCA | 0.537 | 0.191 |
|---------|------|---|-----|-----|-------|-------|

48

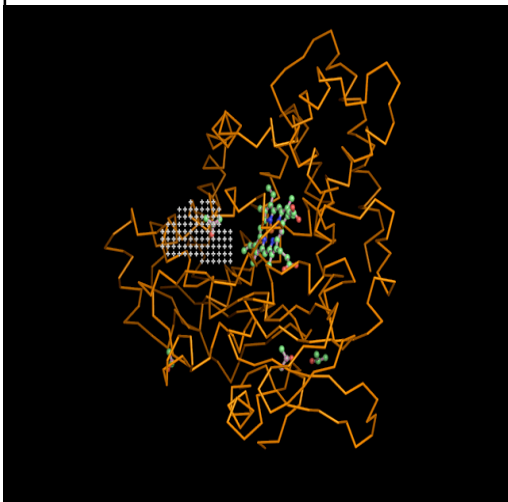

|         |      |   |    |     |      |       |
|---------|------|---|----|-----|------|-------|
| Rv1256c | 2uuq | A | r2 | IPA | 0.35 | 0.186 |
|---------|------|---|----|-----|------|-------|



|                                                                                               |         |      |   |    |     |       |       |
|-----------------------------------------------------------------------------------------------|---------|------|---|----|-----|-------|-------|
| <p>49</p> 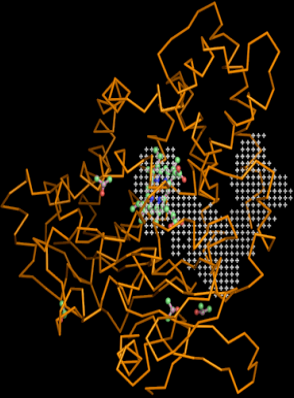   | Rv1256c | 2uuq | A | r3 | HEM | 0.964 | 0.14  |
| <p>50</p>   | Rv1293  | 2o0t | A | r3 | LLP | 1     | 0.024 |
| <p>51</p>  | Rv1295  | 2d1f | A | r6 | PLP | 0.744 | 0.383 |

52

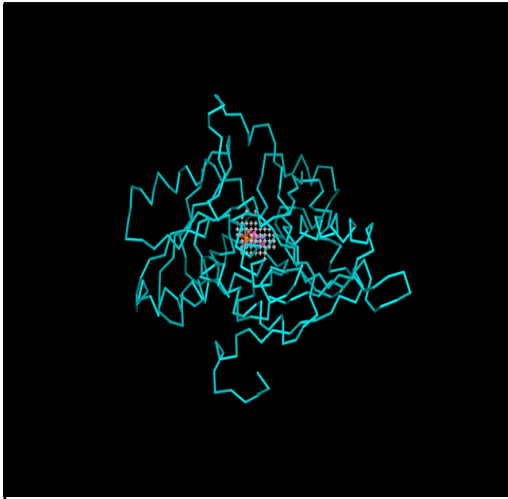

Rv1335

3dwg

A

r3

PLP

0.533

0.362

53

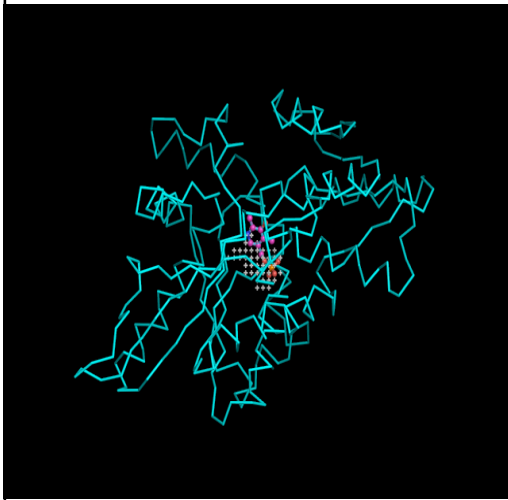

Rv1335

3dwg

B

r2

PLP

0.554

0.289

54

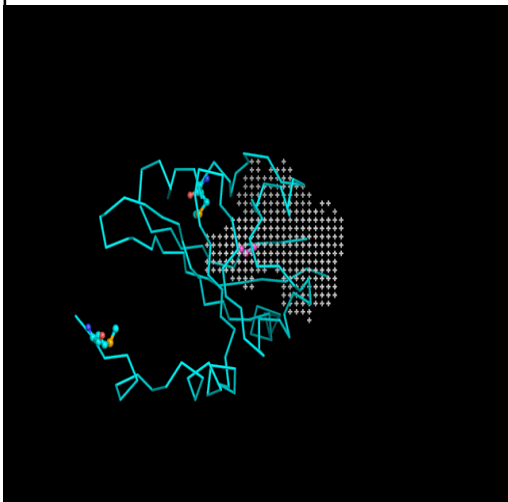

Rv1364c

3kx0

X

r2

PLM

0.917

0.124

55

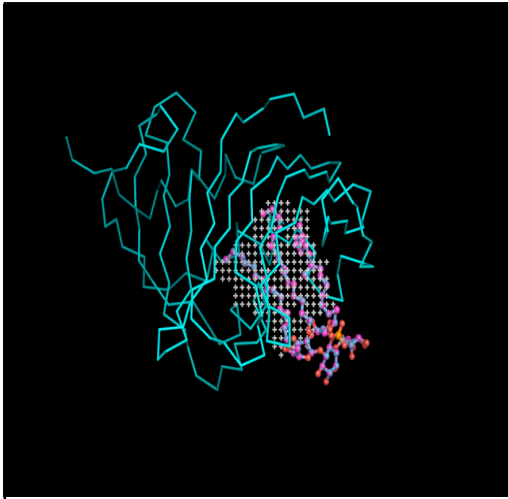

Rv1411c

3mha

A

r1

Z69

1

0.447

56

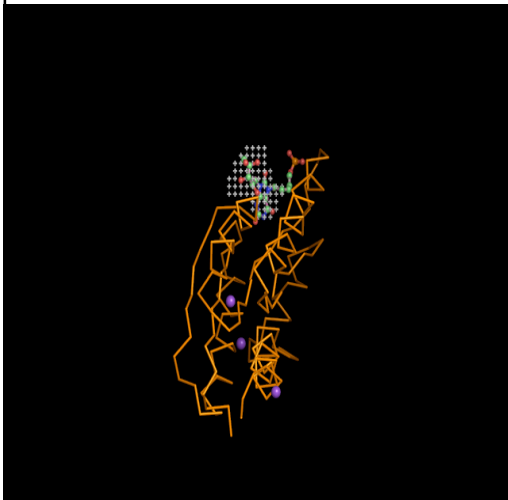

Rv1416

2c92

A

r2

TP6

0.655

0.619

57

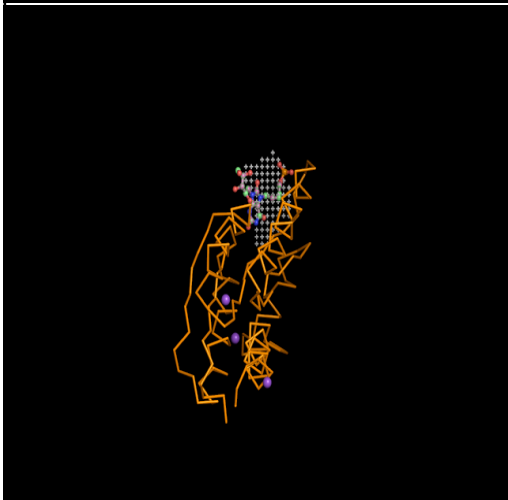

Rv1416

2c92

A

r9

TP6

0.549

0.379

58

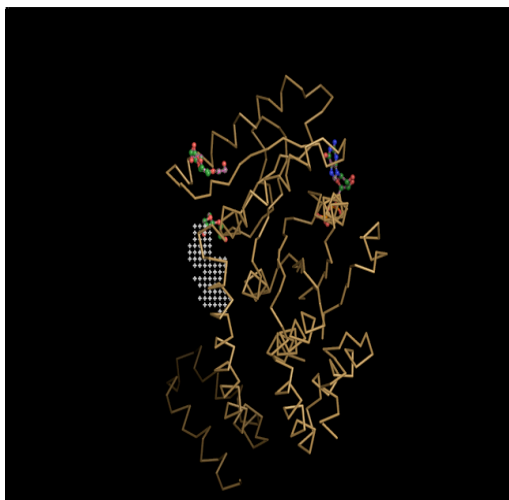

Rv1496

3p32

A

r10

PGE

0.405

0.264

59

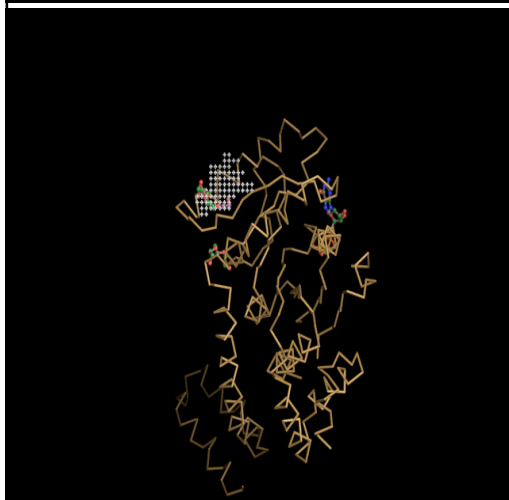

Rv1496

3p32

A

r11

PGE

0.407

0.37

60

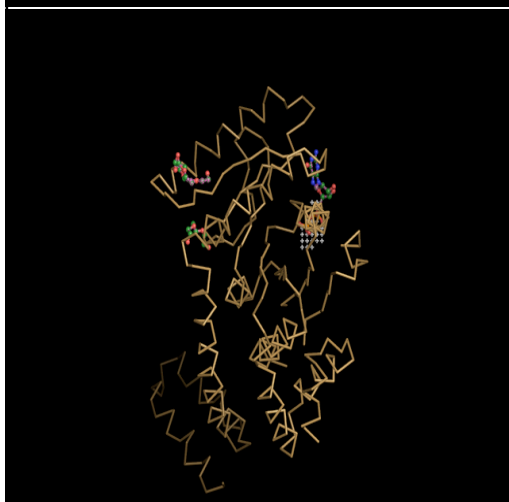

Rv1496

3p32

A

r21

GDP

0.895

0.351

|    |                                                                                     |         |      |   |     |     |       |       |
|----|-------------------------------------------------------------------------------------|---------|------|---|-----|-----|-------|-------|
| 61 | 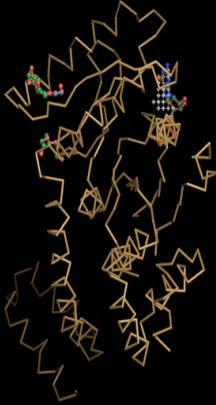   | Rv1496  | 3p32 | A | r22 | GDP | 1     | 0.393 |
| 62 |   | Rv1542c | 2gkm | A | r1  | HEM | 0.853 | 0.746 |
| 63 |  | Rv1542c | 2gkm | A | r2  | HEM | 0.673 | 0.651 |

|                                                                                               |        |      |   |    |     |     |       |
|-----------------------------------------------------------------------------------------------|--------|------|---|----|-----|-----|-------|
| <p>64</p> 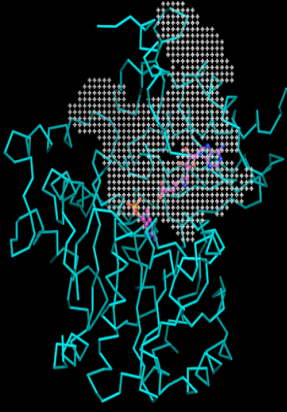   | Rv1568 | 3lv2 | A | r1 | SFG | 1   | 0.018 |
| <p>65</p>   | Rv1656 | 2i6u | A | r4 | NVA | 1   | 0.19  |
| <p>66</p>  | Rv1657 | 3lap | A | r1 | GGB | 0.8 | 0.137 |

67

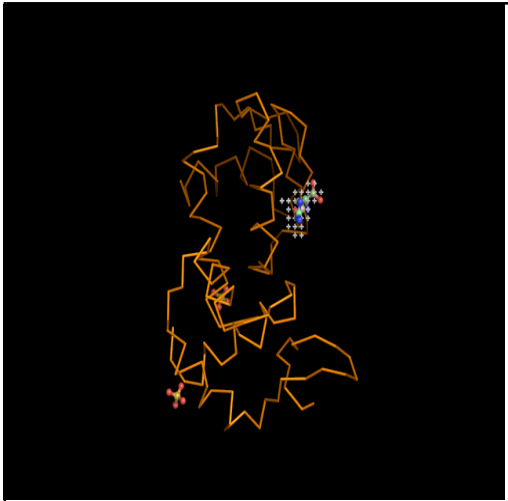

|        |      |   |    |     |   |       |
|--------|------|---|----|-----|---|-------|
| Rv1657 | 3lap | A | r9 | GGB | 1 | 0.761 |
|--------|------|---|----|-----|---|-------|

68

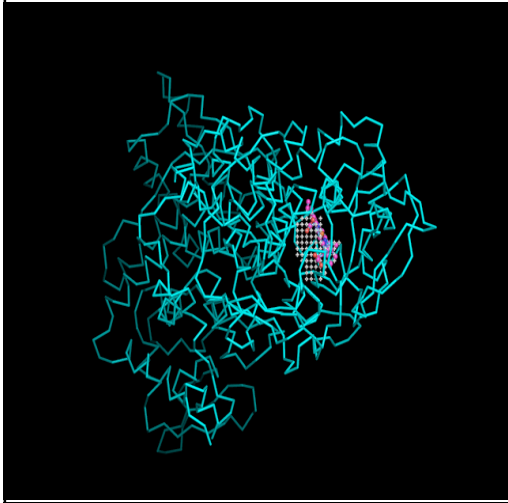

|         |      |   |     |     |       |       |
|---------|------|---|-----|-----|-------|-------|
| Rv1908c | 2cca | A | r16 | HEM | 0.953 | 0.475 |
|---------|------|---|-----|-----|-------|-------|

69

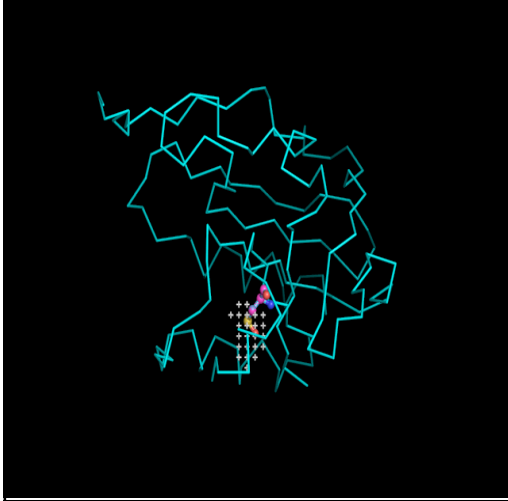

|        |      |   |    |     |       |       |
|--------|------|---|----|-----|-------|-------|
| Rv1932 | 1xvq | A | r2 | CSX | 0.892 | 0.515 |
|--------|------|---|----|-----|-------|-------|

|    |                                                                                     |         |      |   |    |     |       |       |
|----|-------------------------------------------------------------------------------------|---------|------|---|----|-----|-------|-------|
| 70 | 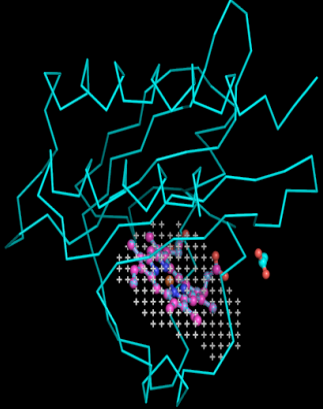   | Rv2027c | 2vzw | A | r1 | HEM | 1     | 0.811 |
| 71 |   | Rv2158c | 2xja | A | r2 | ADP | 0.724 | 0.417 |
| 72 |  | Rv2158c | 2xja | A | r3 | ADP | 1     | 0.097 |



73

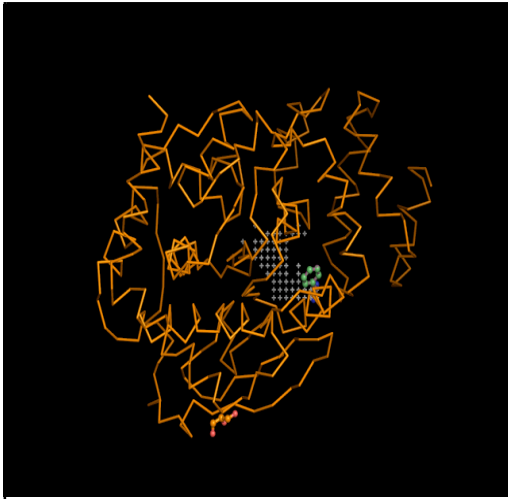

|         |      |   |     |     |       |       |
|---------|------|---|-----|-----|-------|-------|
| Rv2192c | 2bpq | A | r16 | BEN | 0.516 | 0.259 |
|---------|------|---|-----|-----|-------|-------|

74

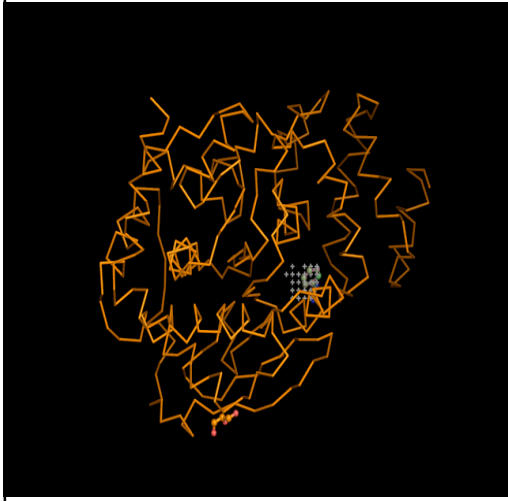

|         |      |   |    |     |       |       |
|---------|------|---|----|-----|-------|-------|
| Rv2192c | 2bpq | A | r3 | BEN | 0.853 | 0.498 |
|---------|------|---|----|-----|-------|-------|

75

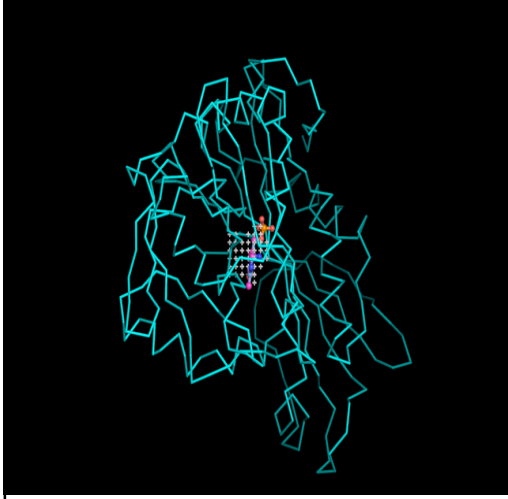

|         |      |   |    |     |       |       |
|---------|------|---|----|-----|-------|-------|
| Rv2210c | 3ht5 | A | r1 | PMP | 0.874 | 0.551 |
|---------|------|---|----|-----|-------|-------|

76

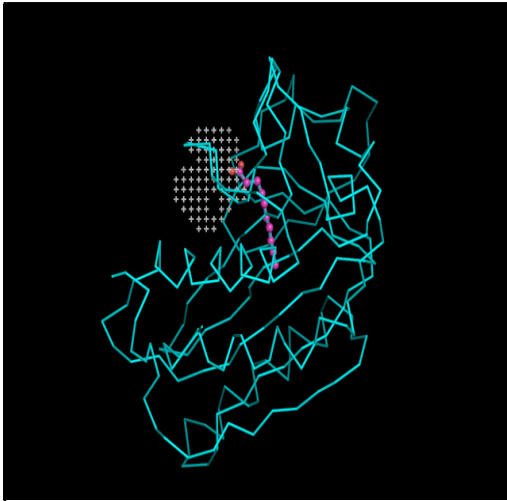

|        |      |   |    |     |       |       |
|--------|------|---|----|-----|-------|-------|
| Rv2217 | 1w66 | A | r2 | DKA | 0.513 | 0.317 |
|--------|------|---|----|-----|-------|-------|

77

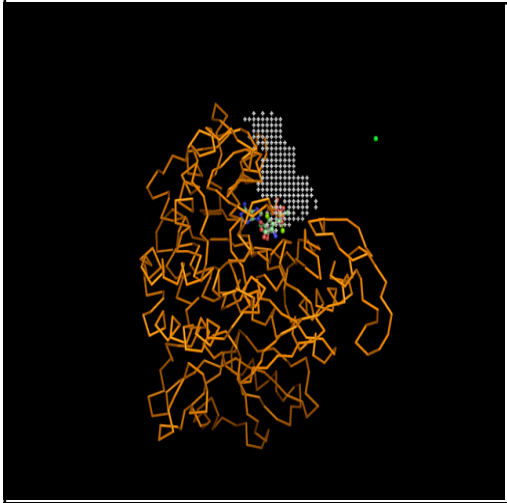

|        |      |   |     |     |       |     |
|--------|------|---|-----|-----|-------|-----|
| Rv2220 | 2bvc | A | r25 | ADP | 0.914 | 0.2 |
|--------|------|---|-----|-----|-------|-----|

78

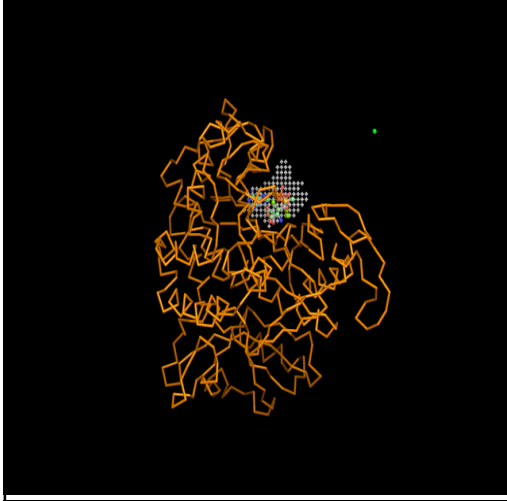

|        |      |   |    |     |   |      |
|--------|------|---|----|-----|---|------|
| Rv2220 | 2bvc | A | r3 | ADP | 1 | 0.34 |
|--------|------|---|----|-----|---|------|

79

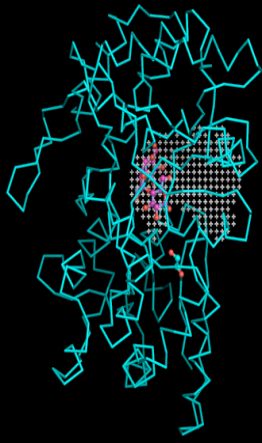

Rv2228c

3hst

A

r2

MLR

0.572

0.445

80

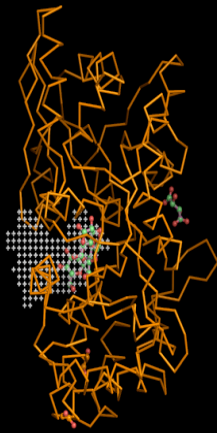

Rv2228c

3hst

C

r1

MLR

0.616

0.369

81

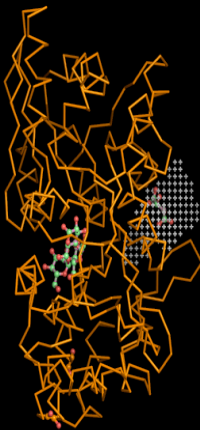

Rv2228c

3hst

C

r5

MLR

0.473

0.124

82

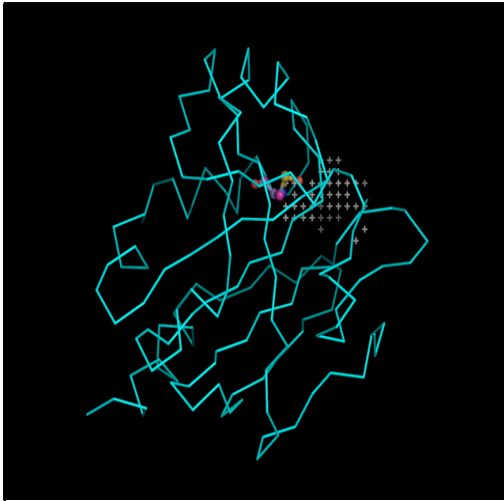

|         |      |   |    |     |       |       |
|---------|------|---|----|-----|-------|-------|
| Rv2238c | 1xvw | A | r8 | CSO | 0.783 | 0.444 |
|---------|------|---|----|-----|-------|-------|

83

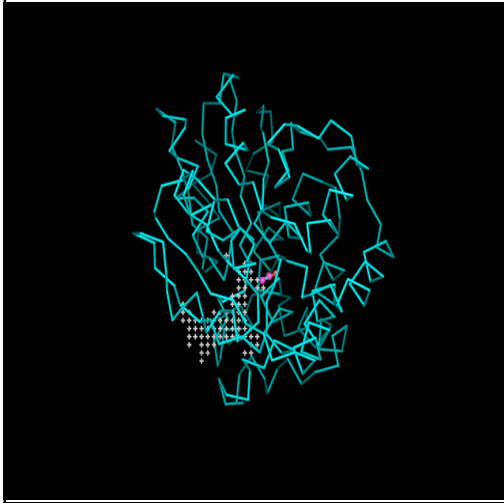

|        |      |   |    |     |       |       |
|--------|------|---|----|-----|-------|-------|
| Rv2243 | 2qc3 | A | r8 | ACY | 0.794 | 0.068 |
|--------|------|---|----|-----|-------|-------|

84

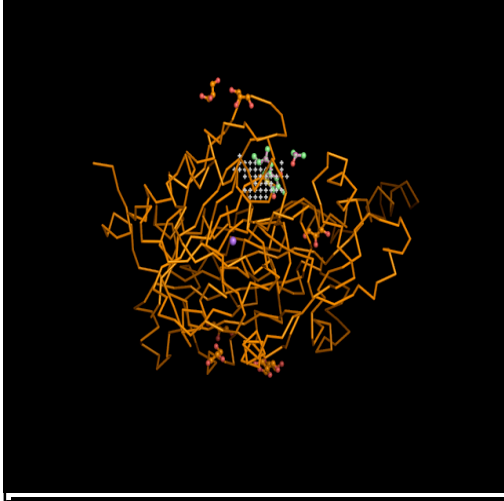

|        |      |   |    |     |       |       |
|--------|------|---|----|-----|-------|-------|
| Rv2245 | 2wge | A | r1 | TLM | 0.736 | 0.463 |
|--------|------|---|----|-----|-------|-------|

|    |                                                                                     |        |      |   |     |     |       |       |
|----|-------------------------------------------------------------------------------------|--------|------|---|-----|-----|-------|-------|
| 85 | 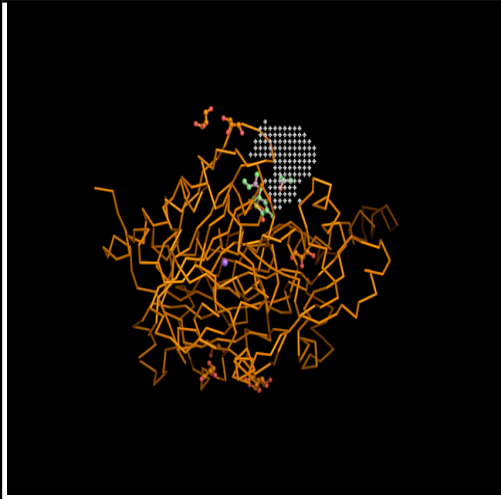   | Rv2245 | 2wge | A | r3  | TLM | 0.62  | 0.268 |
| 86 |   | Rv2266 | 2wm5 | A | r13 | HEM | 0.832 | 0.299 |
| 87 |  | Rv2266 | 2wm5 | A | r2  | HEM | 0.968 | 0.145 |

88

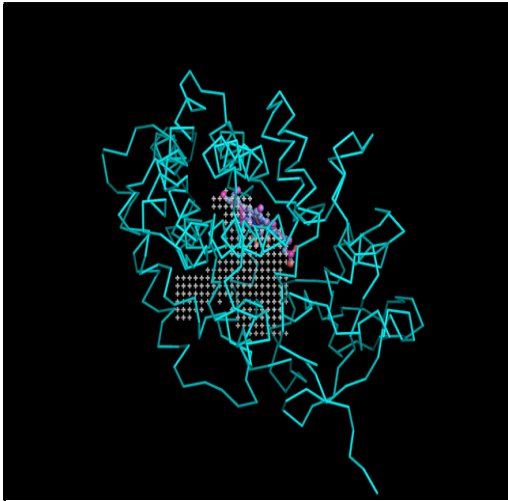

|        |      |   |    |     |       |       |
|--------|------|---|----|-----|-------|-------|
| Rv2276 | 1n40 | A | r2 | HEM | 0.992 | 0.161 |
|--------|------|---|----|-----|-------|-------|

89

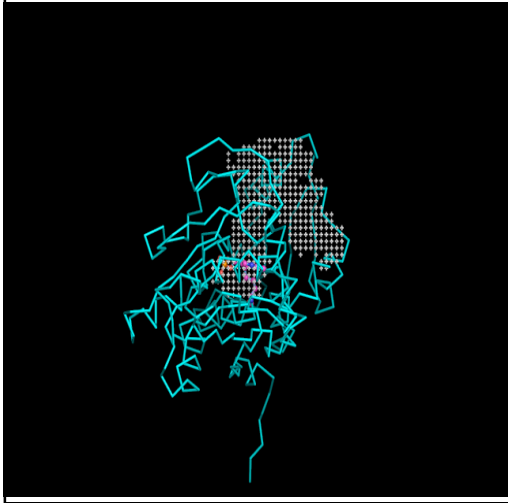

|        |      |   |    |     |   |       |
|--------|------|---|----|-----|---|-------|
| Rv2334 | 2q3b | A | r2 | LLP | 1 | 0.137 |
|--------|------|---|----|-----|---|-------|

90

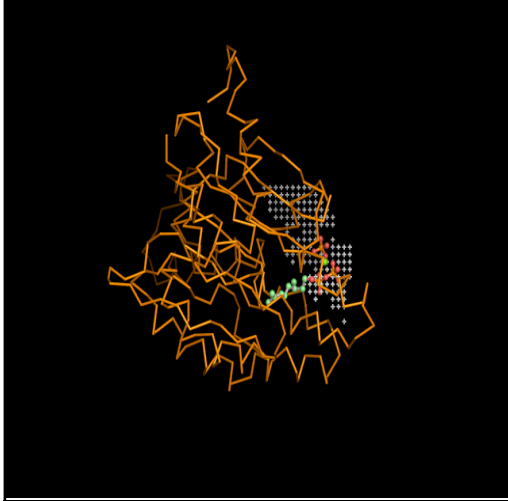

|         |      |   |     |     |       |       |
|---------|------|---|-----|-----|-------|-------|
| Rv2361c | 2vg3 | A | r21 | GPP | 0.694 | 0.268 |
|---------|------|---|-----|-----|-------|-------|

|    |                                                                                     |         |      |   |     |     |       |       |
|----|-------------------------------------------------------------------------------------|---------|------|---|-----|-----|-------|-------|
| 91 |    | Rv2361c | 2vg3 | A | r3  | GPP | 0.913 | 0.264 |
| 92 |   | Rv2438c | 3dla | A | r11 | NXX | 0.292 | 0.244 |
| 93 |  | Rv2438c | 3dla | A | r1  | NXX | 0.427 | 0.259 |

|    |                                                                                     |         |      |   |     |     |       |       |
|----|-------------------------------------------------------------------------------------|---------|------|---|-----|-----|-------|-------|
| 94 | 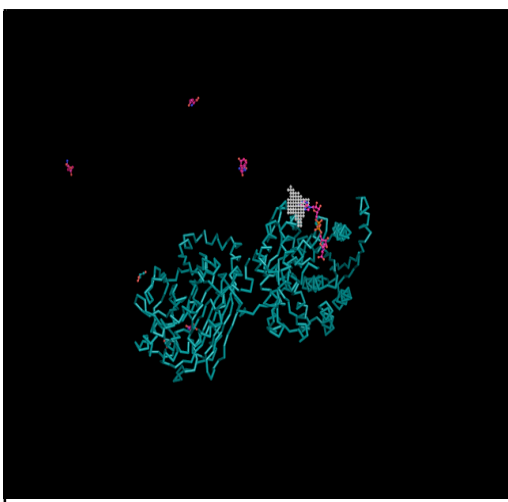   | Rv2438c | 3dla | A | r32 | NXX | 0.365 | 0.365 |
| 95 |   | Rv2438c | 3dla | A | r36 | NXX | 0.604 | 0.111 |
| 96 |  | Rv2438c | 3dla | A | r9  | NXX | 0.984 | 0.028 |



97

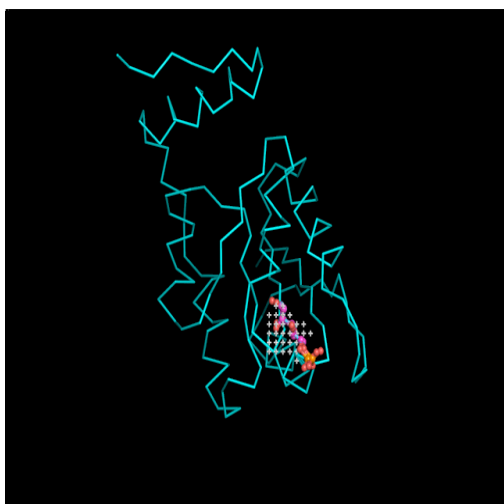

Rv2465c

2vvp

A

r8

5RP

1

1

98

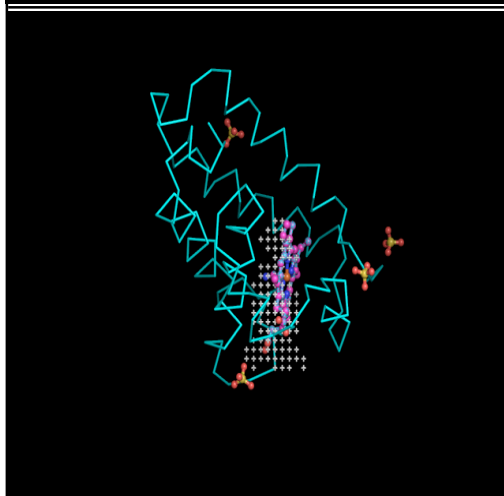

Rv2470

2qrv

A

r1

HEM

0.936

0.541

99

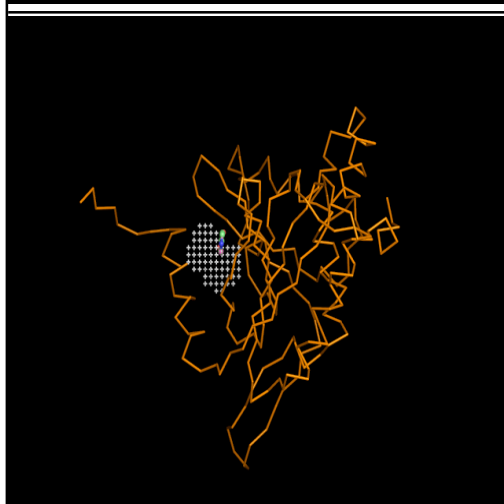

Rv2495c

3l60

A

r2

UNL

0.509

0.015

|     |                                                                                     |         |      |   |    |     |       |       |
|-----|-------------------------------------------------------------------------------------|---------|------|---|----|-----|-------|-------|
| 100 |    | Rv2495c | 3l60 | A | r8 | UNL | 1     | 0.061 |
| 101 |   | Rv2523c | 3hqj | A | r6 | COA | 1     | 0.137 |
| 102 |  | Rv2537c | 3n8k | A | r1 | D1X | 0.914 | 0.638 |

|     |                                                                                     |         |      |   |     |     |       |       |
|-----|-------------------------------------------------------------------------------------|---------|------|---|-----|-----|-------|-------|
| 103 | 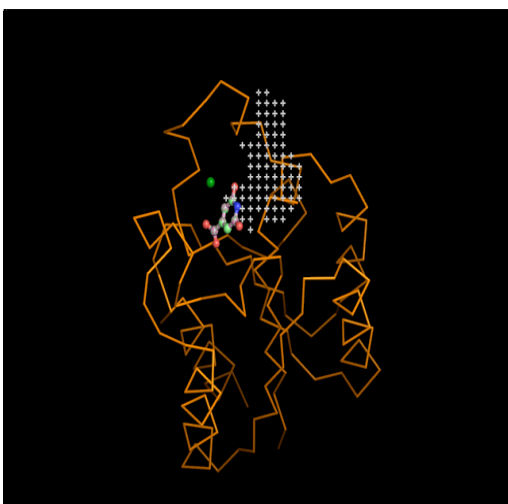   | Rv2537c | 3n8k | A | r4  | D1X | 0.578 | 0.509 |
| 104 |   | Rv2539c | 2iyv | A | r9  | ADP | 0.696 | 0.521 |
| 105 |  | Rv2540c | 2qhf | A | r21 | TRS | 0.516 | 0.392 |

106

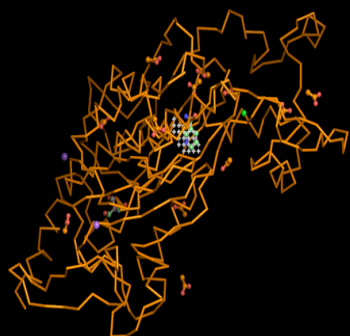

Rv2540c

2qh

A

r7

NCA

0.849

0.797

107

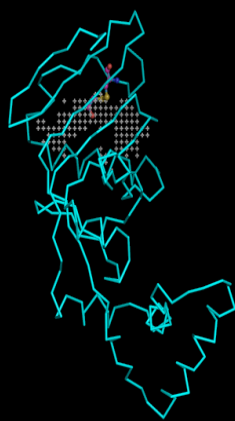

Rv2607

2a2j

A

r9

CME

0.775

0.159

108

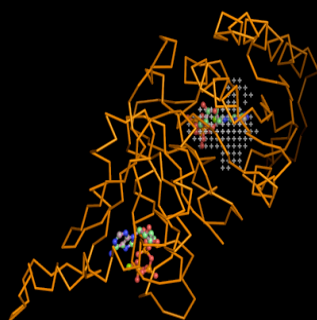

Rv2623

3cis

A

r19

ATP

0.881

0.42

109

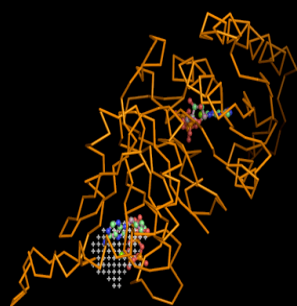

Rv2623

3cis

A

r2

ATP

0.818

0.131

110

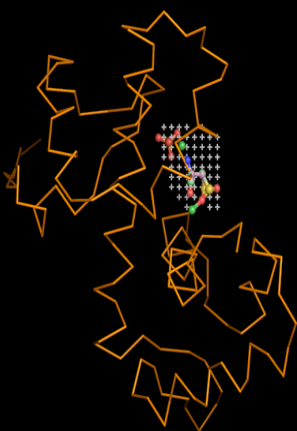

Rv2711

2isy

A

r2

CSO

0.552

0.293

111

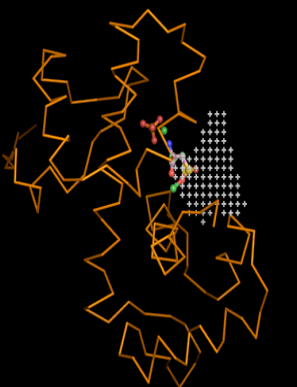

Rv2711

2isy

A

r3

CSO

0.807

0.275

112

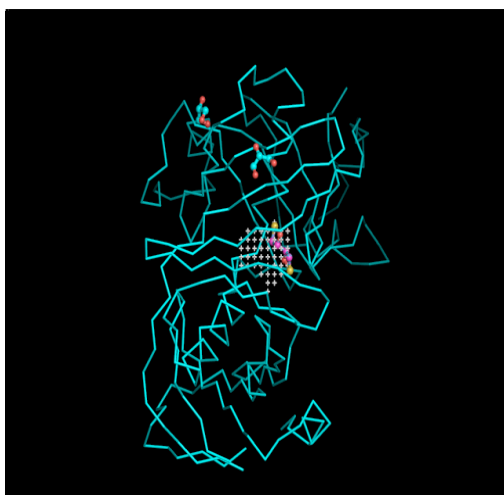

Rv2726c

3fve

A

r1

DTT

0.973

0.229

113

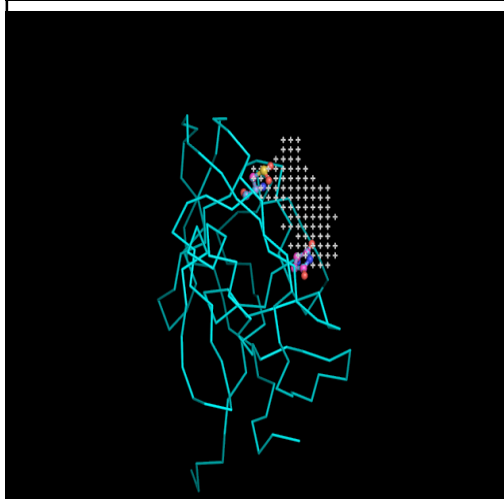

Rv2737c

2imz

A

r1

CSW

0.903

0.251

114

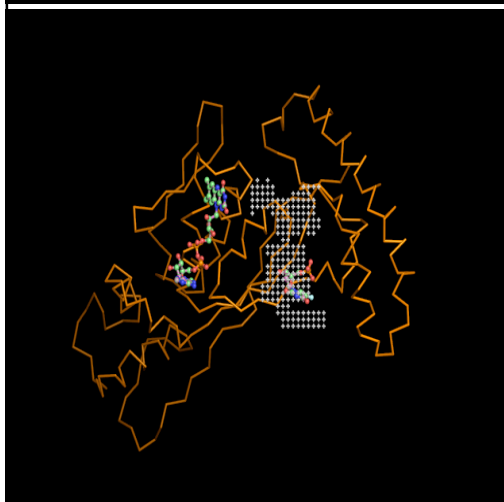

Rv2754c

3gwc

A

r11

UFP

1

0.096

|     |                                                                                     |         |      |   |    |     |       |       |
|-----|-------------------------------------------------------------------------------------|---------|------|---|----|-----|-------|-------|
| 115 |                                                                                     | Rv2754c | 3gwc | A | r6 | FAD | 1     | 0.08  |
| 116 | 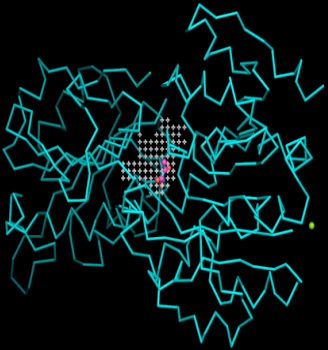  | Rv2780  | 2vhx | A | r5 | PYR | 1     | 0.135 |
| 117 |  | Rv2861c | 3iu7 | A | r1 | FCD | 0.657 | 0.565 |

|     |                                                                                     |         |      |   |     |     |       |       |
|-----|-------------------------------------------------------------------------------------|---------|------|---|-----|-----|-------|-------|
| 118 | 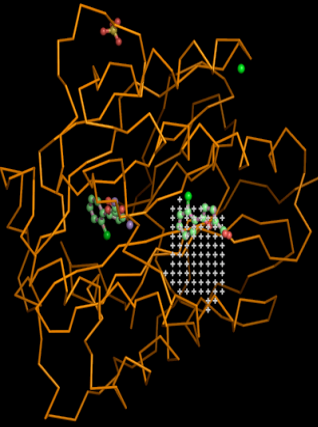   | Rv2861c | 3iu7 | A | r2  | FCD | 0.403 | 0.354 |
| 119 |   | Rv2865  | 3g5o | C | r3  | TRS | 0.725 | 0.629 |
| 120 |  | Rv2870c | 2jd1 | A | r17 | NDP | 0.683 | 0.66  |



121

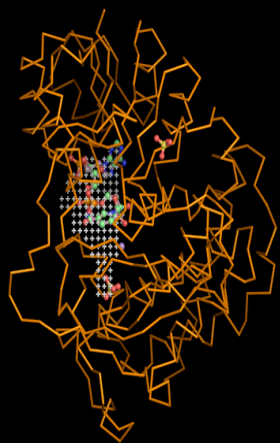

Rv2870c

2jd1

A

r3

NDP

0.991

0.336

122

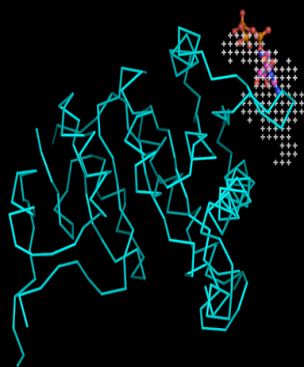

Rv2883c

3nwy

A

r14

GTP

0.529

0.159

123

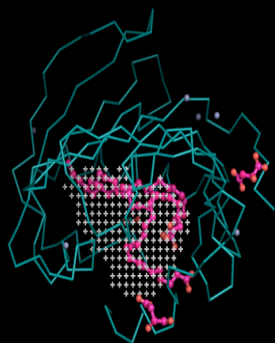

Rv2945c

2byo

A

r12

HXA

0.43

0.297

124

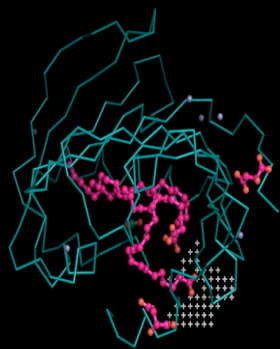

Rv2945c

2byo

A

r15

OAA

0.743

0.168

125

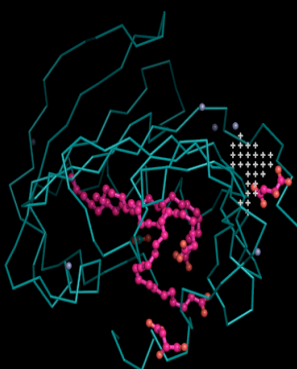

Rv2945c

2byo

A

r1

LNL

1

0.076

126

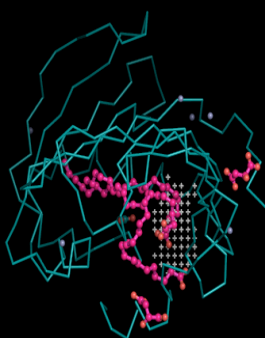

Rv2945c

2byo

A

r2

HXA

0.674

0.555

127

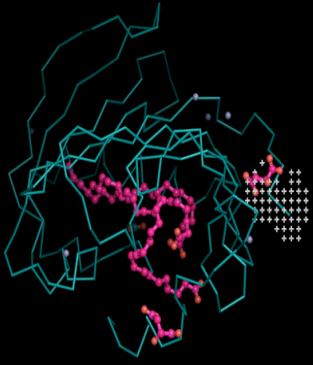

Rv2945c

2byo

A

r4

OAA

1

0.241

128

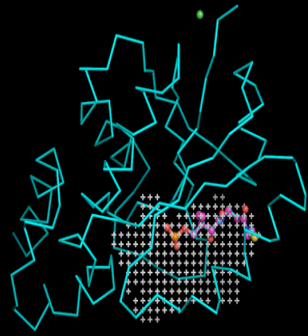

Rv2965c

3nbk

A

r1

PNS

1

0.046

129

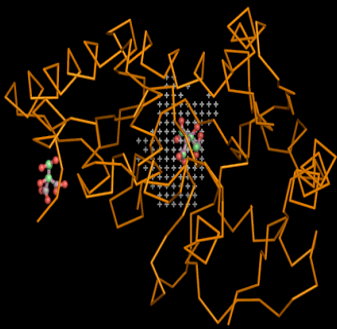

Rv2976c

3a7n

A

r2

FLC

0.6

0.283

|     |                                                                                     |         |      |   |     |     |       |       |
|-----|-------------------------------------------------------------------------------------|---------|------|---|-----|-----|-------|-------|
| 130 | 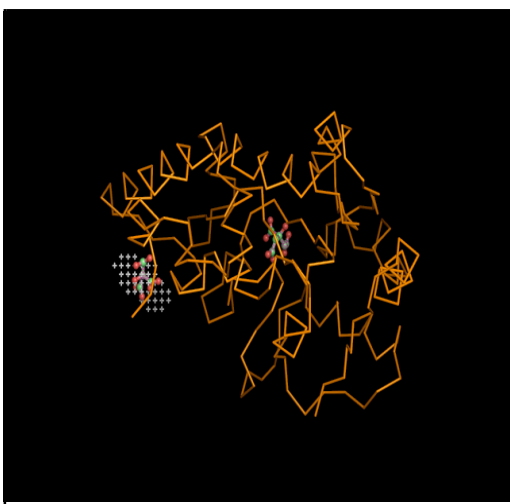   | Rv2976c | 3a7n | A | r4  | FLC | 0.403 | 0.131 |
| 131 |   | Rv2981c | 3lwb | A | r4  | NO3 | 1     | 0.065 |
| 132 |  | Rv2991  | 1rfe | A | r15 | CSX | 0.763 | 0.573 |

133

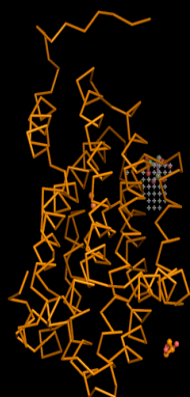

Rv3048c

1uzr

A

r17

CIT

1

0.383

134

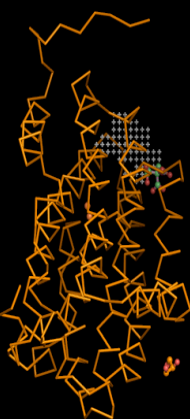

Rv3048c

1uzr

A

r3

CIT

0.684

0.151

135

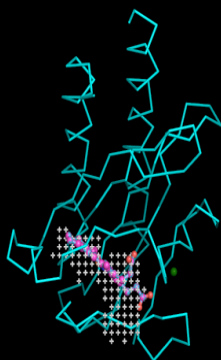

Rv3132c

2w3g

A

r1

HEM

1

0.501

136

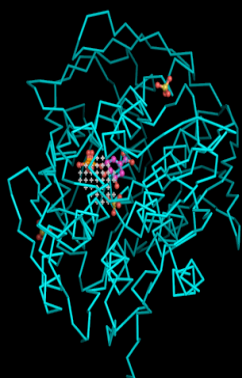

Rv3227

2o0b

A

r2

S3P

0.654

0.4

137

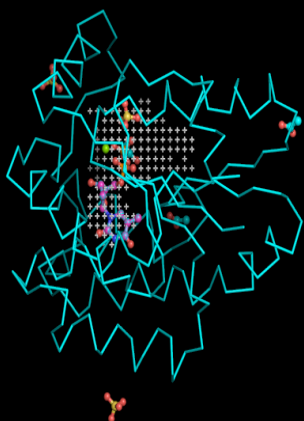

Rv3247c

1gtv

A

r2

TYD

1

0.173

138

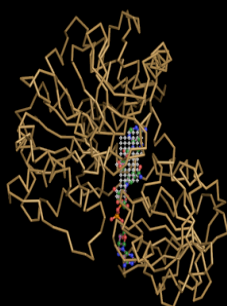

Rv3248c

3ce6

A

r12

NAD

0.695

0.598

139

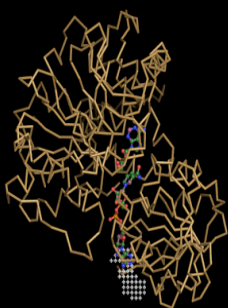

Rv3248c

3ce6

A

r36

ADN

0.555

0.375

140

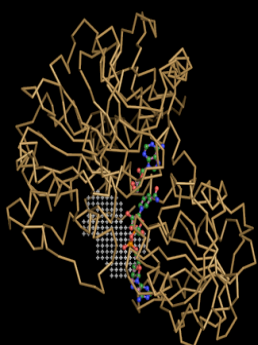

Rv3248c

3ce6

A

r4

NAD

0.446

0.395

141

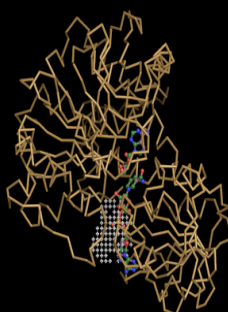

Rv3248c

3ce6

A

r8

ADN

0.513

0.363

142

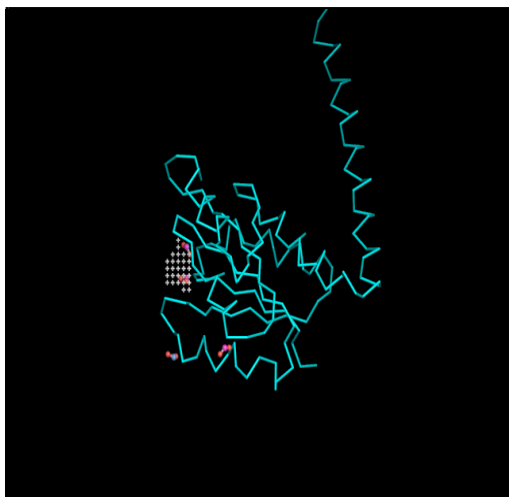

Rv3275c

3lp6

A

r1

FMT

0.665

0.537

143

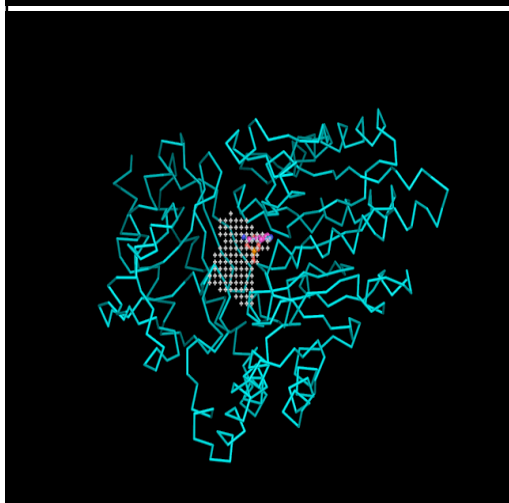

Rv3290c

2cjg

A

r5

PMP

0.84

0.273

144

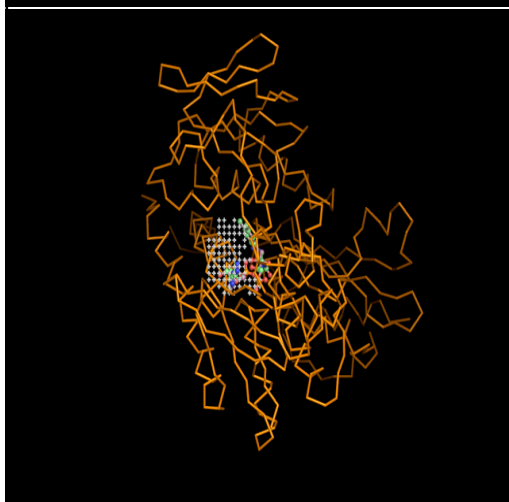

Rv3303c

1xdi

A

r3

FAD

0.742

0.705



|     |                                                                                     |         |      |   |    |     |      |       |
|-----|-------------------------------------------------------------------------------------|---------|------|---|----|-----|------|-------|
| 145 | 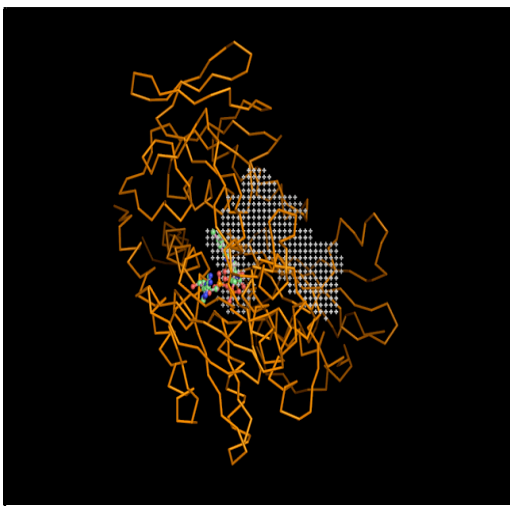   | Rv3303c | 1xdi | A | r6 | FAD | 0.97 | 0.166 |
| 146 |   | Rv3423c | 1xfc | A | r3 | PLP | 1    | 0.071 |
| 147 |  | Rv3465  | 2ixc | A | r2 | TRH | 1    | 0.424 |

|     |                                                                                     |         |      |   |    |     |       |       |
|-----|-------------------------------------------------------------------------------------|---------|------|---|----|-----|-------|-------|
| 148 | 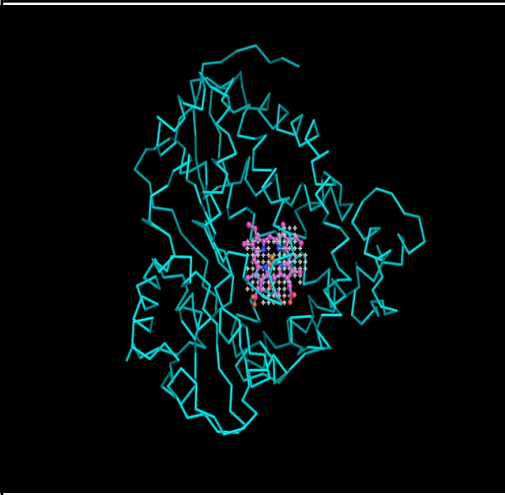   | Rv3518c | 2xkr | A | r5 | HEM | 0.68  | 0.68  |
| 149 |   | Rv3545c | 3ivy | A | r6 | HEM | 0.863 | 0.758 |
| 150 |  | Rv3569c | 2wug | A | r2 | HPK | 0.897 | 0.092 |

151

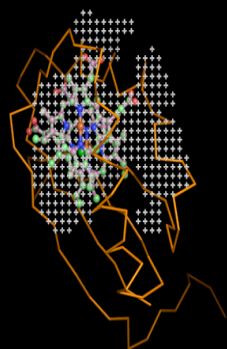

Rv3592

3hx9

A

r2

HEM

0.927

0.286

152

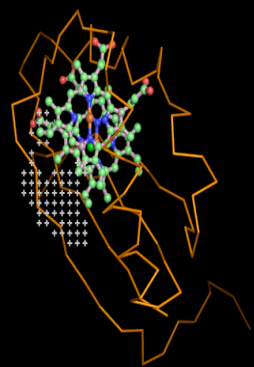

Rv3592

3hx9

A

r4

HEM

0.686

0.223

153

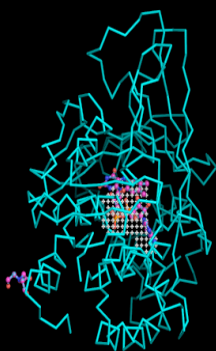

Rv3809c

1v0j

A

r1

FAD

0.855

0.682

154

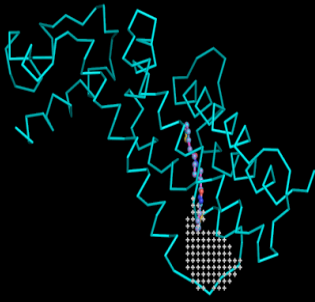

Rv3855

3g1m

A

r2

RF3

0.398

0.326
